# Supplementary material for: Derivation and validation of a clinical prediction rule for delirium in patients admitted to a medical ward: an observational study
Source: PubMed Central journal article supplement — BMJ Open. 2012 Sep 14;2(5):e001599. doi: 10.1136/bmjopen-2012-001599 (PMC3467592; doi:10.1136/bmjopen-2012-001599), 2012-09-14
Supplement: bmjopen-2012-001599.draft_revisions.pdf [file bmjopen-2012-001599.draft_revisions.pdf]

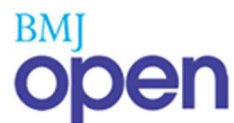

**DERIVATION AND VALIDATION OF A CLINICAL PREDICTION  
RULE FOR DELIRIUM IN PATIENTS ADMITTED TO A  
MEDICAL WARD: AN OBSERVATIONAL STUDY.**

|                                    |                                                                                                                                                                                                                                                   |
|------------------------------------|---------------------------------------------------------------------------------------------------------------------------------------------------------------------------------------------------------------------------------------------------|
| Journal:                           | <i>BMJ Open</i>                                                                                                                                                                                                                                   |
| Manuscript ID:                     | bmjopen-2012-001599                                                                                                                                                                                                                               |
| Article Type:                      | Research                                                                                                                                                                                                                                          |
| Date Submitted by the Author:      | 01-Jun-2012                                                                                                                                                                                                                                       |
| Complete List of Authors:          | Urreta, Iratxe<br>Emparanza, Jose Ignacio; Osakidetza,<br>Martinez, Juan Antonio<br>Basabe, Iban; Osakidetza,<br>Belastegui, Ana; Osakidetza,<br>Aguirre, Cristina; Osakidetza,<br>Goikoetxea, Xabier; Osakidetza,<br>Liceaga, Nerea; osakidetza, |
| <b>Primary Subject<br>Heading</b>: | Medical management                                                                                                                                                                                                                                |
| Secondary Subject Heading:         | Neurology                                                                                                                                                                                                                                         |
| Keywords:                          | Delirium, clinical prediction rule, elderly                                                                                                                                                                                                       |
|                                    |                                                                                                                                                                                                                                                   |

SCHOLARONE™  
Manuscripts

1  
2  
3 **DERIVATION AND VALIDATION OF A CLINICAL PREDICTION RULE FOR**  
4 **DELIRIUM IN PATIENTS ADMITTED TO A MEDICAL WARD: AN**  
5 **OBSERVATIONAL STUDY.**  
6  
7  
8  
9

10  
11  
12  
13 J Martinez RN<sup>1</sup>, A Belastegui RN<sup>1</sup>, I Basabe MD<sup>1</sup>, X Goicoechea MD<sup>1</sup>, C Agirre  
14 MD<sup>1</sup>, N Lizeaga RN<sup>1</sup>, I Urreta MD<sup>2</sup>, JI Emparanza MD<sup>3</sup>.  
15  
16

17  
18 <sup>1</sup> Dept. of Internal Medicine, Donostia University Hospital, Spain  
19

20  
21 <sup>2</sup> Clinical Epidemiology Unit, Critical Appraisal Skills Programme – Spain  
22 (CASPe), Donostia University Hospital, Spain  
23

24  
25 <sup>3</sup> Clinical Epidemiology Unit, CIBER-ESP & CASPe, Donostia University  
26 Hospital, Spain  
27  
28  
29  
30

31  
32  
33  
34  
35 Corresponding author:  
36

37  
38 I Urreta  
39

40  
41 Email: IRATXE.URRETABARALLOBRE@OSAKIDETZA.NET  
42  
43  
44  
45  
46  
47  
48  
49  
50  
51  
52  
53  
54  
55  
56  
57  
58  
59  
60

## Copyright

The Corresponding Author has the right to grant on behalf of all authors and does grant on behalf of all authors, a worldwide licence to the Publishers and its licensees in perpetuity, in all forms, formats and media (whether known now or created in the future), to i) publish, reproduce, distribute, display and store the Contribution, ii) translate the Contribution into other languages, create adaptations, reprints, include within collections and create summaries, extracts and/or, abstracts of the Contribution, iii) create any other derivative work(s) based on the Contribution, iv) to exploit all subsidiary rights in the Contribution, v) the inclusion of electronic links from the Contribution to third party material where-ever it may be located; and, vi) licence any third party to do any or all of the above.”

**What is already known on this topic**

Delirium is a common and serious disorder associated with morbidity and mortality in patients admitted to acute medical wards.

The rules published so far have limited applicability in a busy medicine unit.

**What this study adds**

A new clinical prediction rule for delirium has been developed and validated.

This is a simple clinical prediction rule based on easily measurable variables.

This rule may facilitate early identification of high risk patients and target early initiation of preventive measures.

## ABSTRACT

**Objectives:** To develop and validate a simple clinical prediction rule, based on variables easily measurable at admission, to identify patients at high risk of developing delirium during their hospital stay on an internal medicine ward.

**Design:** Prospective study of two cohorts of patients admitted between May 1<sup>st</sup> and June 30<sup>th</sup> 2008 (derivation cohort), and between May 1<sup>st</sup> and June 30<sup>th</sup> 2009 (validation cohort).

**Setting:** A tertiary hospital in Donostia-Gipuzkoa (Spain)

**Participants:** 397 patients participated in the study. The mean age and prevalence of delirium were 75.9 years and 13% respectively in the derivation cohort, and 75.8 years and 25% in the validation cohort.

**Main outcome measures:** The predictive variables analysed and finally included in the rule were: being aged 85 years old or older, being dependent in 5 or more activities of daily living, and taking 2 or more psychotropic drugs (antipsychotics, benzodiazepines, antidepressants, anticonvulsant, and/or antimentia drugs). The variable of interest was delirium as defined by the short Confusion Assessment Method, which assesses four characteristics: acute onset and fluctuating course, inattention, disorganised thinking, and altered level of consciousness.

**Results:** We developed a rule in which the individual risk of delirium is obtained by adding 1 point for each criterion met (age $\geq$ 85, high level of dependence, and being on psychotropic medication). The result is considered positive if the score is  $\geq$  1. The rule accuracy was: sensitivity = 93.4% (95% CI: 85.5-97.2),

1  
2  
3 specificity = 60.6% (95% CI: 54.1-66.8), PPV = 44.4% (95% CI: 36.9-52.1), and  
4  
5 NPV = 96.5% (95% CI: 92-98.5). The area under the ROC curve was 0.85 for  
6  
7 the validation cohort.  
8  
9

10 **Conclusions:** The presence or absence of any of the three predictive factors  
11 (age $\geq$ 85, high level of dependence, and psychotropic medication) allowed us to  
12 classify patients on internal medicine wards according to the risk of developing  
13 delirium. The simplicity of the variables in our clinical prediction rule means that  
14  
15  
16  
17  
18  
19  
20  
21  
22  
23  
24  
25  
26  
27  
28  
29  
30  
31  
32  
33  
34  
35  
36  
37  
38  
39  
40  
41  
42  
43  
44  
45  
46  
47  
48  
49  
50  
51  
52  
53  
54  
55  
56  
57  
58  
59  
60

the data collection required is feasible in busy medicine units.

## Introduction:

Delirium, also referred to as acute confusional state, is an acute disturbance of attention and cognition with a fluctuating course that often appears in hospitalised patients. Between 10% and 30% of patients admitted to general hospitals develop delirium,<sup>1-3</sup> with a prevalence of up to 60% among frail elderly patients.<sup>4</sup> It is a serious complication that increases mortality<sup>5</sup> and reduces the functional status of patients,<sup>6</sup> as well as increasing the length of hospital stays<sup>7-8</sup> and rates of readmission.<sup>9</sup> While the pathophysiology of delirium remains poorly understood, multiple risk factors have been identified.<sup>10</sup> These can be classified into two groups: factors that increase baseline vulnerability (presence of dementia, cerebrovascular accident, Parkinson's disease, old age, and sensory impairment, among others);<sup>11</sup> and those that may be a trigger (such as polypharmacy, infection, and dehydration).<sup>12-14</sup>

Various interventions to improve modifiable variables have been found effective in preventing the occurrence of delirium.<sup>15-18</sup> Therefore, the identification of patients at high risk of developing delirium is particularly important.<sup>19</sup>

Clinical prediction rules are useful tools for classifying patients at different levels of risk.<sup>20</sup> Other authors proposed a rule to predict the risk of developing delirium<sup>21</sup> for use in patients admitted due to clinical worsening of their condition, but its use has not become widespread in our setting since it requires variables that are difficult to measure on admission (Mini-Mental State Examination score, and visual acuity, among others).

1  
2  
3 The objective of this study was to derive and validate a simple clinical prediction  
4 rule, based on variables that are easily measurable and are often routinely  
5 taken on admission, to identify patients at high risk of developing delirium during  
6 their hospital stay on an internal medicine ward.  
7  
8  
9  
10

11  
12 The identification of these patients will allow us to introduce the necessary  
13 preventative measures.  
14  
15  
16  
17  
18  
19  
20  
21  
22  
23  
24  
25  
26  
27  
28  
29  
30  
31  
32  
33  
34  
35  
36  
37  
38  
39  
40  
41  
42  
43  
44  
45  
46  
47  
48  
49  
50  
51  
52  
53  
54  
55  
56  
57  
58  
59  
60



## Methods

### *Design*

To develop the clinical prediction rule we assessed a prospective cohort of consecutive patients admitted in four internal medicine wards. Subsequently, we assessed a different prospective cohort of consecutive patients to validate the rule.

### *Patients*

The derivation cohort was 397 consecutive patients aged 18 years or over, of both sexes, who were admitted to any of four internal medicine wards at Donostia Hospital between May 1<sup>st</sup> 2008 and June 30<sup>th</sup> 2008, and we used no other exclusion criteria. The following year, between May 1<sup>st</sup> 2009 and June 30<sup>th</sup> 2009, we recruited the validation cohort on the same basis: 302 consecutive patients aged 18 or over, of both sexes, who were admitted to any of the same four internal medicine wards at the hospital.

### *Assessment of delirium*

We defined delirium using the short version of the Confusion Assessment Method (22), a short form for assessing confusion. This diagnostic algorithm assesses four characteristics: 1) acute onset and fluctuating course, 2) inattention, 3) disorganised thinking, and 4) altered level of consciousness. The

1  
2  
3 diagnosis of delirium required the presence of 1) and 2), and either 3) or 4) (or  
4 both). This assessment was performed by two independent researchers, when  
5  
6  
7 it was considered that patients were ready for discharge, after analysis of any  
8  
9 relevant data in their medical record and nursing report. Disagreements were  
10  
11 resolved by consensus with a third researcher. All these evaluators were  
12  
13 blinded to the potential predictive variables.  
14  
15

### 16 17 18 19 20 *Potential predictors* 21

22  
23 The potential predictive variables for delirium were selected after a systematic  
24  
25 review of the literature<sup>10-14 23-25</sup>. We sought to identify variables that were easy  
26  
27 to measure and are often routinely recorded on admission to these wards.  
28  
29

30 The following variables were selected and measured on admission: age (years),  
31  
32 sex, systolic blood pressure (mmHg), heart rate (beats/min), respiratory rate  
33  
34 (breaths/minute), axillary temperature (°C), oxygen therapy (no: not used; and  
35  
36 yes: oxygen with nasal cannula, mask, and/or oxygen at home), fluid therapy,  
37  
38 presence of urinary catheter, level of consciousness (normal: alert; or altered:  
39  
40 drowsiness, unresponsiveness to voice, unresponsiveness to pain, and/or  
41  
42 generally unresponsive), diagnosis of infection at admission (respiratory, urinary  
43  
44 or other types of infections; or no infection: any other cause of admission),  
45  
46 admission in the previous year, admission in the previous month, hearing  
47  
48 impairment (use of a hearing aid, or deafness reported by the patient or  
49  
50 caregiver), vision impairment (regular use of glasses or reduction in visual  
51  
52 acuity reported by the patient or caregiver), and dementia (in a medical report or  
53  
54 reported by the caregiver). In addition, blood tests were taken on admission to  
55  
56  
57  
58  
59  
60

1  
2  
3 measure the following: haematocrit (%), levels of urea (mg/dl), creatinine  
4 (mg/dl), sodium (mEq/l), potassium (mEq/l), and glucose (mg/dl), as well as  
5  
6  
7 white blood cell ( $10^3/\mu\text{l}$ ) and neutrophil ( $10^3/\mu\text{l}$ ) counts. Lastly, certain  
8  
9  
10 characteristics of patients prior to admission were also assessed: level of  
11  
12 dependence for activities of daily living (personal hygiene and grooming,  
13  
14 dressing and undressing, getting onto or off toilet, ambulation, bowel and  
15  
16 bladder control, and self-feeding) as dichotomous variables (dependent;  
17  
18 independent); presence of pressure ulcers, and excess alcohol intake ( $>60$   
19  
20 g/ethanol/day), as well as use of certain types of medication: benzodiazepines,  
21  
22 antidepressants, antidementia drugs, antipsychotics, anti-Parkinson's drugs, or  
23  
24 anticonvulsants.  
25  
26  
27  
28  
29  
30

### 31 *Statistical analysis*

32  
33  
34 A descriptive analysis was carried out, based on the calculation of means and  
35  
36 standard deviations for continuous variables, and absolute or relative  
37  
38 frequencies as percentages for categorical variables. Subsequently, some  
39  
40 continuous variables were dichotomised using the median value.  
41  
42  
43  
44  
45  
46

### 47 *Sample size*

48  
49  
50 Assuming a prevalence of delirium at admission of 10%, it was calculated that  
51  
52 we needed 10 patients with delirium for each variable included in the model,  
53  
54 with the intention that the model should be as parsimonious as possible.  
55  
56  
57  
58  
59  
60

### *Comparison between derivation and validation cohorts*

We compared the characteristics of patients in the derivation cohort with those in the validation cohort using the Student's t-test for continuous variables and the Chi square test for ordinal and dichotomous variables.

### *Derivation of the prediction rule*

The characteristics of patients who developed delirium were compared with those of patients who did not, again using the Student's t-test or the Chi square test as appropriate. A p-value  $<0.25$  was taken to indicate potentially predictive variables and those meeting this criteria were included in the multivariate model. Then, using a stepwise logistic regression model we selected the terms (predictive variables) to be included in the final model. The criteria for entry in the model and for removal were  $p \leq 0.05$  and  $p \geq 0.10$  respectively. The Hosmer Lemeshow test was performed to assess the goodness of fit of this model.

We note that we also explored selecting variables for an alternative prediction rule by recursive partitioning. However, as the performance of this rule was poorer than that of the rule obtained by logistic regression, we decided to report exclusively the data concerning the rule derived using the latter method.

### *Validation cohort and model performance*

The clinical prediction rule was applied to the validation cohort. We report the incidence of delirium as a function of score on the rule and the ORs using the

1  
2  
3 lowest risk category as the reference. The performance of the rule in the two  
4  
5 cohorts was explored using ROC curve analysis.  
6  
7

8 To assess the diagnostic accuracy of the rule, we constructed a 2x2 table for  
9  
10 calculation of the following: sensitivity, specificity, and positive and negative  
11  
12 predictive values. The 95% confidence intervals of these indicators were also  
13  
14 calculated assuming a binomial distribution.  
15  
16

17  
18 We used SPSS 19.0 and MedCalc for all the analysis.  
19  
20  
21  
22  
23  
24  
25  
26  
27  
28  
29  
30  
31  
32  
33  
34  
35  
36  
37  
38  
39  
40  
41  
42  
43  
44  
45  
46  
47  
48  
49  
50  
51  
52  
53  
54  
55  
56  
57  
58  
59  
60

## Results

In the validation cohort, 13% of patients (52 out of 397) developed delirium, and in the derivation cohort the prevalence was 25.2% (76 out 302). Table 1 summarises baseline characteristics of the derivation and validation cohorts. Patients included in our study were elderly ( $76.4 \pm 13.3$  years old) and slightly more than half were women (52%, 362 out of 699). The derivation and validation cohorts were similar in some respects, namely, age, sex, mean length of stay, and types of medication. On the other hand, patients in the validation cohort were significantly more dependant in certain activities of daily living: personal hygiene and grooming, dressing and undressing, and getting onto or off toilet.

Tables 2 to 6 report the results of the univariate analysis in which the risk factors were compared between patients who developed delirium and those who did not within the derivation cohort. Those who developed delirium were significantly older and had slightly higher respiratory rates, but there were no significant differences in blood test results.

Age was dichotomised using a cut-off of 85 years, a value that was found to have a sensitivity of 85% and a specificity of 56% for delirium by the ROC curve analysis. We found that the risk of delirium associated with the types of medication considered was similar for all except antipsychotic drugs, for which the risk was twice as high. Accordingly, the medication data was coded according to the number of different drugs patients were taking at admission with each antidepressant, antimentia, or anticonvulsant drug contributing equally, while antipsychotic drugs were weighted by a factor of two. The

1  
2  
3 activities of daily living data were also dichotomised with a cut-off of reported  
4  
5 impairments in five activities.  
6  
7

8 The scores for the clinical prediction rule were assigned on the basis of  
9  
10 regression coefficients obtained in the logistic regression model (Table 7). One  
11  
12 point was given to patients older than 85 years, to those who had 2 or more  
13  
14 points in the variable drugs, and to those with impairments in five or more of the  
15  
16 activities of daily living considered. Therefore, the total score for the rule ranged  
17  
18 between 0 and 3.  
19  
20

21  
22 Table 9 and Figures 1 and 2 describe the performance of the rule in the  
23  
24 derivation and validation cohorts. In both cohorts, we observed higher rates of  
25  
26 delirium associated with higher scores on the rule, the model having a good  
27  
28 predictive power for the validation cohort (area under the ROC curve, AUC =  
29  
30 0.85). In contrast with what would be expected, the values obtained in the  
31  
32 validation cohort are better than those obtained in the derivation cohort, and this  
33  
34 is probably related to the higher prevalence of delirium in validation group.  
35  
36  
37

38 In particular, Table 9 lists the sensitivity (Se) and specificity (Sp), as well as the  
39  
40 positive and negative predictive values (PPVs and NPVs) obtained when the  
41  
42 rule was dichotomised as negative (a score of 0) or positive (as score of  $\geq 1$ ).  
43  
44 For the validation cohort, the Se, Sp, NPV, and PPV were 93.4%, 60.6%, 96%,  
45  
46 and 44% respectively.  
47  
48  
49  
50  
51  
52  
53  
54  
55  
56  
57  
58  
59  
60

## DISCUSSION

In this prospective study, we identified three independent predictive factors for delirium: being 85 years old or older, being dependent in five or more activities of daily living (of the six considered), and taking psychotropic drugs (antipsychotics, benzodiazepines, antidepressants, anticonvulsants, and/or antimentia drugs). With these factors we developed a clinical prediction rule in which an individual risk score for delirium is obtained by adding 1 point for each of the factors present. Applying this rule, patients are classified as positive if they have a total score of 1 or more. Selecting the cut-off point for the highest sensitivity, the accuracy of the rule was: Se=93.4% (95% CI 85.5 to 97.2), Sp=60.6% (95% CI 54.1 to 66.8), PPV = 44.4% (95% CI 36.9 to 52.1), and a NPV = 96.5% (95% CI 92 to 98.5). The AUCs were 0.77 and 0.85 in the derivation and validation cohorts, respectively.

In the derivation cohort, 13% of patients developed delirium, while the prevalence was somewhat higher, 25%, in the validation cohort. Patients were elderly (mean ages in the derivation and validation cohorts were 75.9 +/- 13.3 years and 76.8 +/- 13.3 years respectively), and there were slightly more women (52%). The mean length of hospital stay was 8 +/- 5.8 days and overall mortality was 5%.

There are multiple factors for the development of delirium, the predisposing and triggering factors being well defined. The predisposing factors are mostly related to degenerative brain disease (dementia, arteriosclerosis, Parkinson's disease, and depression).<sup>10 11</sup> On the other hand, there are a diverse range of



1  
2  
3 triggering factors, in particular, medication, the presence of infection, surgery,  
4  
5 metabolic disorders, and water-electrolyte imbalances, among others.<sup>13 14 23-25</sup>  
6  
7

8  
9 In the present study, we have only explored variables that are readily available  
10  
11 on admission, in order to use the predictive rule at that stage and be able to  
12  
13 introduce preventative measures immediately in high-risk patients. These would  
14  
15 include trying to avoid triggering factors for the development of delirium (such  
16  
17 as changes of room/ward, unnecessary catheterisation, inadequate oral  
18  
19 hydration, and polypharmacy).  
20

21  
22 Interestingly, the factors found to be good predictors for the development of  
23  
24 delirium in our study (age $\geq$ 85, high level of dependence, and being on  
25  
26 psychotropic medication), to some extent, indirectly reflect the severity of the  
27  
28 organic brain damage in patients with delirium.  
29

30  
31  
32 Another predictive rule for delirium in this type of patients has been published  
33  
34 (21) but showed a significantly lower performance than that we obtained (AUC  
35  
36 = 0.66 [0.55-0.77] vs. AUC=0.85 [0.80-0.90] with our rule). Further, in our  
37  
38 opinion, it is also more difficult to apply than the rule we propose. The simplicity  
39  
40 of the variables included in our rule makes data collection a feasible task for  
41  
42 busy healthcare units.  
43  
44

45  
46 Between 10% and 60% of patients admitted to hospital develop delirium,  
47  
48 depending on the type of patient, the prevalence in frail elderly patients being at  
49  
50 the top of this range. In our study, it was 13% and 25% in the derivation and  
51  
52 validations cohorts, respectively. Delirium is well known to be difficult to  
53  
54 diagnose and a wide range of instruments have been developed to help detect  
55  
56 the condition (26,27). We used the Confusion Assessment Method<sup>22</sup> that has a  
57  
58  
59  
60

1  
2  
3 sensitivity of 96% (95% CI 80-100%) and a specificity of 93% (95% CI 84-  
4  
5 100%). In our study, the doctors in charge of the diagnosis of delirium were  
6  
7 specialists in internal medicine, with considerable training and experience in the  
8  
9 management of this type of patients, any differences being resolved by  
10  
11 consensus with a third specialist. We note, however, that the diagnoses of  
12  
13 delirium were not confirmed by a psychiatrist. This may partially explain the low  
14  
15 prevalence of delirium in our patients, that is, it may be that only the most  
16  
17 clinically striking cases, those which required pharmacological treatment, were  
18  
19 recognised.  
20  
21

22  
23 The association between delirium and an increase of morbidity and mortality<sup>5 6 9</sup>  
24  
25 is well known, as are the effectiveness of preventive measures to avoid the  
26  
27 development of the disease.<sup>15-18</sup> The use of the proposed predictive rule would  
28  
29 allow us to classify around half of our inpatients (53%) as high-risk. Taking  
30  
31 preventative measures in this high risk group, up to 93.4% of those who  
32  
33 developed delirium in our study would have been covered by the measures and  
34  
35 might not have then developed the condition.  
36  
37  
38

39  
40 It would interesting for the clinical predictive rule we propose to be validated in  
41  
42 other cohorts of frail elderly patients with worsening of multiple medical  
43  
44 conditions to check its external validity.  
45  
46  
47  
48  
49  
50  
51  
52  
53  
54  
55  
56  
57  
58  
59  
60

1  
2  
3 **ACKNOWLEDGEMENTS:** We would like to thank all the medical and nursing  
4 staff of the Department of Internal Medicine at Donostia University Hospital for  
5 their contribution to the study.  
6  
7  
8

9  
10 **CONTRIBUTORS:** JM, AB, JIE and IU participated in the design of the study.  
11 JM, AB, IB, XG, CA and NL collected all data. JIE and IU carried out the  
12 statistical analysis. JM, IU and JIE drafted the manuscript. All authors approved  
13 the final version to be published. IU and JM are the guarantors.  
14  
15  
16  
17

18  
19  
20 **COMPETING INTERESTS:** All authors have completed the Unified Competing  
21 interests form at [http://www.icmje.org/coi\\_disclosure.pdf](http://www.icmje.org/coi_disclosure.pdf) (available on request  
22 from the corresponding author) and declare: no support from any organisation  
23 for the submitted work; no financial relationships with any organisations that  
24 might have an interest in the submitted work in the previous three years; and no  
25 other relationships or activities that could appear to have influenced the  
26 submitted work.  
27  
28  
29  
30  
31  
32  
33  
34

35 **ETHICAL APPROVAL:** The design was evaluated and then approved by the  
36 Clinical Research Ethics Committee of the Gipuzkoa Health region.  
37  
38  
39  
40  
41  
42  
43  
44  
45  
46  
47  
48  
49  
50  
51  
52  
53  
54  
55  
56  
57  
58  
59  
60

**REFERENCES:**

1) Cole MG, Ciampi A, Belzile E, Zhong L. Persistent delirium in older hospital patients: a systematic review of frequency and prognosis. *Age Ageing*. 2009; 38: 19-26

2) Trzepacz PT. Delirium. Advances in diagnosis, pathophysiology, and treatment. *Psychiatric Clinics of North America* 1996; 19 (3): 429-448.

3) Leentjens AF, van der Mast RC. Delirium in elderly people: an update. *Curr Opin Psychiatry*. 2005 May; 18 (3): 325-330.

4) Witlox J, Eurelings LS, de Jonghe JF, Kalisvaart KJ, Eikelenboom P, van Gool WA. Delirium in elderly patients and the risk of postdischarge mortality, institutionalization, and dementia: a meta-analysis. *JAMA*. 2010; 304: 443-451.

5) McCusker J, Cole M, Abrahamowicz M, Primeau F, Belzile E. Delirium predicts 12-month mortality. *Archives of Internal Medicine* 2002; 162 (4): 457-463.

6) Moller JT, Cluitmans P, Rasmussen LS, Houx P, Rasmussen H, Canet J, et al. Long-term postoperative cognitive dysfunction in the elderly ISPOCD1 study. ISPOCD investigators. International Study of Post-Operative Cognitive Dysfunction. *Lancet* 1998; 351 (9106): 857-861.

7) McCusker J, Cole MG, Dendukuri N, Belzile E. Does delirium increase hospital stay? *Journal of the American Geriatrics Society* 2003 51 (11):1539-1546.

1  
2  
3  
4  
5  
6 8) Stevens LE, de Moore GM, Simpson JM. Delirium in hospital: does it  
7 increase length of stay? Australian & New Zealand Journal of Psychiatry 1998;  
8 32 (6): 805-808.  
9

10  
11  
12  
13  
14 9) Inouye SK, Rushing JT, Foreman MD, Palmer RM, Pompei P. Does delirium  
15 contribute to poor hospital outcomes? A three-site epidemiologic study. Journal  
16 of General Internal Medicine 1998; 13: 234-242.  
17  
18

19  
20  
21  
22  
23 10) Inouye SK. Delirium in hospitalized older patients: recognition and risk  
24 factors. Journal of Geriatric Psychiatry & Neurology 1998; 11 (3): 118-125;  
25 discussion 157-158.  
26  
27

28  
29  
30 11) Fick DM; Agostini JV; Inouye SK. Delirium superimposed on dementia: a  
31 systematic review. J Am Geriatr Soc 2002; 50 (10):1723-1732.  
32  
33

34  
35 12) Inouye SK, Charpentier PA. Precipitating factors for delirium in hospitalized  
36 elderly persons. Predictive model and interrelationship with baseline  
37 vulnerability. JAMA. 1996; 275 (11): 852-857.  
38  
39

40  
41  
42 13) Laurila JV, Laakkonen ML, Tilvis RS, Pitkala KH. Predisposing and  
43 precipitating factors for delirium in a frail geriatric population. J Psychosom  
44 Res. 2008 Sep; 65 (3): 249-254.  
45  
46  
47

48  
49  
50 14) Van Rompaey B, Schuurmans MJ, Shortridge-Baggett LM, Truijen S,  
51 Bossaert L. Risk factors for intensive care delirium: a systematic review.  
52 Intensive Crit Care Nurs. 2008 Apr; 24 (2):98-107.  
53  
54  
55

- 1  
2  
3 15) Inouye, S, Bogardus, ST, Charpentier, PA, et al. A multicomponent  
4 intervention to prevent delirium in hospitalized older patients. *N Engl J Med*  
5 1999; 340: 669-676.  
6  
7  
8  
9  
10 16) Milisen K, Lemiengre J, Braes T, Foreman M D. Multicomponent  
11 intervention strategies for managing delirium in hospitalized older people:  
12 systematic review. *Journal of Advanced Nursing* 2005; 52 (1): 79-90  
13  
14  
15  
16  
17  
18 17) Vidan MT, Sanchez E, Alonso M, Montero B, Ortiz J, Serra JA. An  
19 Intervention Integrated into Daily Clinical Practice Reduces the Incidence of  
20 Delirium During Hospitalization in Elderly Patients. *J Am Geriatr Soc* 2009;  
21 57:2029–2036.  
22  
23  
24  
25  
26 18) Siddiqi N, Holt R, Britton AM, Holmes J. Interventions for preventing  
27 delirium in hospitalised patients. *Cochrane Database of Systematic Reviews*  
28 2007, Issue 2. Art. No.: CD005563. DOI: 10.1002/14651858.CD005563.pub2.  
29  
30  
31  
32  
33 19) Leslie DL, Marcantonio ER, Zhang Y, Summer LLs, Intuye SK. One-Year  
34 Health Care Costs Associated With Delirium in the Elderly Population. *Arch*  
35 *Intern Med.* 2008;168 (1):27-32  
36  
37  
38  
39 20) Laupacis A, Sekar N, Stiell IG. Clinical prediction rules. A review and  
40 suggested modifications of methodological standards. *JAMA.* 1997 Feb 12; 277  
41 (6):488-494.  
42  
43  
44  
45  
46  
47  
48 21) Inouye SK, Viscoli CM, Horwitz RI, Hurst LD, Tinetti ME. A predictive model  
49 for delirium in hospitalized elderly medical patients based on admission  
50 characteristics. *Ann Intern Med.* 1993 Sep 15; 119 (6): 474-481.  
51  
52  
53  
54  
55  
56  
57  
58  
59  
60

1  
2  
3 22) Inouye SK, van Dyck CH, Alessi CA, Balkin S, Siegal AP, Horwitz RI.  
4 Clarifying confusion: the confusion assessment method. A new method for  
5 detection of delirium. *Ann Intern Med*. 1990 Dec 15;113 (12):941-948.  
6  
7  
8

9  
10  
11 23) Elie M, Cole MG, Primeau FJ, Bellavance F. Delirium risk factors in elderly  
12 hospitalized patients. *J Gen Intern Med*. 1998 Mar; 13 (3):204-212.  
13  
14

15  
16 24) Pisani, MA, Murphy, TE, Van Ness, PH, et al. Characteristics associated  
17 with delirium in older patients in a medical intensive care unit. *Arch Intern Med*  
18 2007; 167:1629-1634.  
19  
20  
21

22  
23 25) McCusker, J, Cole, M, Abrahamowicz, M, et al. Environmental risk factors  
24 for delirium in hospitalized older people. *J Am Geriatr Soc* 2001; 49:1327-1334.  
25  
26

27  
28 26) Camilla L. Wong, MD, Jayna Holroyd-Leduc, MD, FRCPC, David L. Simel,  
29 MD, MHS, Sharon E. Straus, MD, MSc, FRCPC. Does This Patient Have  
30 Delirium? Value of Bedside Instruments. *JAMA*. 2010; 304 (7): 779-786  
31  
32  
33  
34  
35

36  
37 27) Moraga AV, Rodriguez-Pascual C. Acurate diagnosis of delirium in elderly  
38 patients. *Curr Opin Psychiatry*. 2007 May; 20 (3):262-267.  
39  
40  
41  
42  
43  
44  
45  
46  
47  
48  
49  
50  
51  
52  
53  
54  
55  
56  
57  
58  
59  
60

**Table 1** Characteristics of patients in the derivation and validation cohorts

| <b>Characteristics</b>                              | <b>Derivation cohort<br/>(n=397)</b> | <b>Validation cohort<br/>(n= 302)</b> | <b>p</b> |
|-----------------------------------------------------|--------------------------------------|---------------------------------------|----------|
| Mean age (SD)                                       | 75.9 (13.3)                          | 76.8 (13.3)                           | N.S      |
| Mean length of stay (SD)                            | 8.4 (5.8)                            | 8 (6.1)                               | N.S      |
| Women (%)                                           | 197 (49.6)                           | 165 (54.3)                            | N.S      |
| <b>Medication (%)</b>                               |                                      |                                       |          |
| Benzodiazepines                                     | 162 (40.8)                           | 134 (44.4)                            | N.S      |
| Antidepressants                                     | 75 (18.9)                            | 74 (24.5)                             | N.S      |
| Antidementia drugs                                  | 20 (5)                               | 11 (3.6)                              | N.S      |
| antipsychotics                                      | 24 (6)                               | 21 (7)                                | N.S      |
| Anti-Parkinson's agents                             | 13 (3.3)                             | 6(2)                                  | N.S      |
| Anticonvulsants                                     | 20 (5)                               | 16 (5.3)                              | N.S      |
| <b>Dependence in activities of daily living (%)</b> |                                      |                                       |          |
| Personal hygiene and grooming                       | 155 (39)                             | 171 (56.6)                            | <0.05    |
| Dressing and undressing                             | 155 (39)                             | 174 (57.6)                            | <0.05    |
| Getting onto or off toilet                          | 146 (36.8)                           | 161 (53.3)                            | <0.05    |
| Ambulation                                          | 163 (41.1)                           | 166 (55)                              | <0.05    |
| Bowel and bladder control                           | 139 (35)                             | 122 (40.4)                            | N.S      |
| Self-feeding                                        | 109 (27.5)                           | 102 (33.8)                            | N.S      |



**Table 2** Derivation cohort: univariate analysis of patient clinical variables considered potential risk factors for delirium at admission. Mean (SD)

| Variables                              | Delirium     | No delirium  | p     |
|----------------------------------------|--------------|--------------|-------|
| Age (years)                            | 83.83 (9.8)  | 74.75 (13.4) | 0.000 |
| Blood pressure (mmHg)                  | 127.5 (27.1) | 132.3 (26.5) | 0.22  |
| Respiratory rate (breaths/min)         | 27.92 (9.6)  | 24.42 (6.6)  | 0.001 |
| Heart rate (beats/min)                 | 86.6 (23.8)  | 84.06 (22.5) | N.S   |
| Body temperature (°C)                  | 36.7 (0.7)   | 36.7 (0.8)   | N.S   |
| Women (%)                              | 26 (50)      | 171 (49.6)   | NS    |
| Excess alcohol intake (%)              | 2 (3.8)      | 19 (5.5)     | NS    |
| Mean length of stay in hospital (days) | 9.3 (6.6)    | 8.3 (5.6)    | N.S   |
| Admission in previous year (%)         | 26 (50)      | 152 (44.1)   | NS    |
| Admission in previous month (%)        | 8(15.1)      | 45 (84.9)    | NS    |

**Table 3** Derivation cohort: univariate analysis of patient blood test results at admission. Mean (SD)

| Variables                            | Delirium     | No delirium  | p     |
|--------------------------------------|--------------|--------------|-------|
| Haematocrit (%)                      | 39.31 (7.6)  | 37.42 (6.5)  | 0.058 |
| Urea (mg/dl)                         | 62.3 (31.6)  | 60.3 (40.7)  | N.S   |
| Creatinine (mg/dl)                   | 1.14 (0.5)   | 1.25 (0.9)   | N.S   |
| Sodium (mEq/l)                       | 138.5 (5.6)  | 173.9 (5.5)  | N.S   |
| Potassium (mEq/l)                    | 5.2 (6.9)    | 4.8 (0.7)    | N.S   |
| Glucose (mg/dl)                      | 140.1 (66.3) | 140.8 (78.8) | N.S   |
| White blood cells<br>(10e3/ $\mu$ l) | 12.1 (12.2)  | 10.1(4.7)    | N.S   |
| Neutrophils<br>(10e3/ $\mu$ l)       | 9.8 (8.5)    | 10.8 (14.8)  | N.S   |

**Table 4** Derivation cohort: univariate analysis of patient medication prior to admission.

| Variables          | Delirium  | No delirium | p     |
|--------------------|-----------|-------------|-------|
| Antidepressants    | 16 (30.8) | 59 (17.1)   | 0.023 |
| Antidementia drugs | 5 (9.6)   | 15 (4.3)    | 0.16  |
| Antipsychotics     | 8 (15.4)  | 16 (4.6)    | 0.007 |
| Anticonvulsants    | 5 (9.6)   | 15 (4.3)    | 0.16  |
| Benzodiazepines    | 23 (44.2) | 139 (40.3)  | NS    |

**Table 5** Derivation cohort: variables characterising patient status on admission

| Variables              | Delirium  | No delirium | p     |
|------------------------|-----------|-------------|-------|
| Urinary catheter       | 13 (25)   | 37(10.7)    | NS    |
| Fluid therapy          | 29 (55.8) | 124 (35.9)  | 0.009 |
| Vision impairment      | 36 (69.2) | 192 (55.7)  | 0.072 |
| Hearing impairment     | 9 (17.3)  | 87 (25.2)   | NS    |
| Oxygen therapy         | 32 (61.5) | 202 (58.6)  | NS    |
| Pressure ulcers        | 3 (5.8)   | 25 (7.3)    | NS    |
| Level of consciousness | 5 (21.7)  | 18 (78.3)   | 0.20  |
| Dementia               | 18 (34.6) | 49 (14.2)   | 0.001 |
| Infection              | 28 (53.8) | 141(40.8)   | 0.097 |

**Table 6** Derivation cohort: univariate analysis of patient activities of daily living

| Variables                              | Delirium  | No delirium | p      |
|----------------------------------------|-----------|-------------|--------|
| Impaired personal hygiene and grooming | 39 (75)   | 116 (33.6)  | 0.0001 |
| Impaired dressing and undressing       | 38 (73.1) | 117 (33.9)  | 0.0001 |
| Impaired getting onto or off toilet    | 36 (69.2) | 110 (31.9)  | 0.001  |
| Impaired ambulation                    | 38 (73.1) | 125 (36.2)  | 0.001  |
| Impaired bowel and bladder control     | 36 (69.2) | 103 (29.9)  | 0.001  |
| Impaired self-feeding                  | 31 (59.6) | 78 (22.6)   | 0.000  |
| Dependence in $\geq 5$ activities      | 36 (69.2) | 87(25.2)    | 0.0001 |

**Table 7** Variables included in the logistic regression model

| Variables          | B      | SE    | Wald    | Degrees of freedom | Sig.  | Exp(B) |
|--------------------|--------|-------|---------|--------------------|-------|--------|
| Age <sup>1</sup>   | 1.381  | 0.349 | 15.664  | 1                  | 0.000 | 3.978  |
| DADLs <sup>2</sup> | 1.397  | 0.350 | 15.924  | 1                  | 0.000 | 4.042  |
| Drugs <sup>3</sup> | 1.515  | 0.443 | 11.715  | 1                  | 0.001 | 4.547  |
| Constant           | -3.234 | 0.295 | 120.122 | 1                  | 0.000 | 0.039  |

<sup>1</sup> Age: > 85 years old

<sup>2</sup> DADLs: Dependence in 5 or more activities of daily livings

<sup>3</sup> Drugs: total of 2 or more points for drugs taken on admission where antidepressants, antidementia drugs, and anticonvulsants score 1 point each, and antipsychotics score 2 points

**Table 8** Logistic regression model

| Group                     | Points on the prediction rule | Incidence of delirium (%) | OR                | AUC (IC 95%)     |
|---------------------------|-------------------------------|---------------------------|-------------------|------------------|
| Derivation cohort (n=397) |                               |                           |                   | 0.77 (0.73-0.82) |
|                           | 0                             | 9/219 (4)                 | Reference         |                  |
|                           | 1                             | 16/116 (14)               | 3.7 (1.5-8.7)     |                  |
|                           | ≥2                            | 27/62 (43)                | 18 (7.8-41.5)     |                  |
| Validation cohort (n=302) |                               |                           |                   | 0.85 (0.8-0.88)  |
|                           | 0                             | 5/142 (3.5)               | Reference         |                  |
|                           | 1                             | 18/77 (23)                | 8.3 (2.9-23.6)    |                  |
|                           | ≥2                            | 53/83 (64)                | 48.4 (17.8-131.4) |                  |

**Table 9** A 2 X 2 table for the validation cohort

| Cut-off point | Delirium | No delirium | Total |
|---------------|----------|-------------|-------|
| 0 (negative)  | 5        | 137         | 142   |
| ≥1 (positive) | 71       | 89          | 160   |
|               | 76       | 226         | 302   |

Sensitivity = 93.4%, 95% CI 85.5 to 97.2

Specificity = 60.6%, 95% CI 54.1 to 66.8

PPV = 44.4%, 95% CI 36.9 to 52.1

NPV = 96.5%, 95% CI 92 to 98.5



Figure 1: ROC curve for the derivation cohort

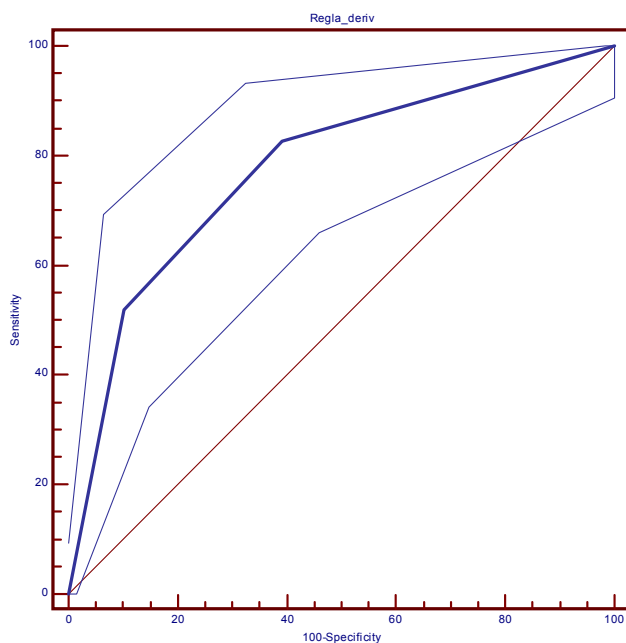

er review only

1  
2  
3  
4  
5  
6  
7  
8  
9  
10  
11  
12  
13  
14  
15  
16  
17  
18  
19  
20  
21  
22  
23  
24  
25  
26  
27  
28  
29  
30  
31  
32  
33  
34  
35  
36  
37  
38  
39  
40  
41  
42  
43  
44  
45  
46  
47  
48  
49  
50  
51  
52  
53  
54  
55  
56  
57  
58  
59  
60

Figure 2: ROC curve for the validation cohort

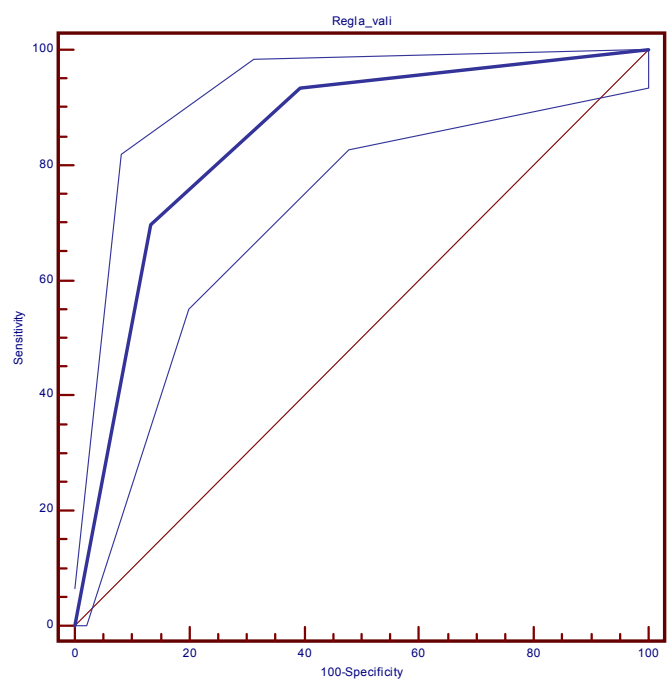

review only

STROBE Statement—Checklist of items that should be included in reports of *cohort studies*

|                              | Item No | Recommendation                                                                                                                                                                                                                                                                                                                                                                                                |
|------------------------------|---------|---------------------------------------------------------------------------------------------------------------------------------------------------------------------------------------------------------------------------------------------------------------------------------------------------------------------------------------------------------------------------------------------------------------|
| <b>Title and abstract</b>    | 1       | (a) Indicate the study's design with a commonly used term in the title or the abstract<br>(b) Provide in the abstract an informative and balanced summary of what was done and what was found                                                                                                                                                                                                                 |
| <b>Introduction</b>          |         |                                                                                                                                                                                                                                                                                                                                                                                                               |
| Background/rationale         | 2       | Explain the scientific background and rationale for the investigation being reported                                                                                                                                                                                                                                                                                                                          |
| Objectives                   | 3       | State specific objectives, including any prespecified hypotheses                                                                                                                                                                                                                                                                                                                                              |
| <b>Methods</b>               |         |                                                                                                                                                                                                                                                                                                                                                                                                               |
| Study design                 | 4       | Present key elements of study design early in the paper                                                                                                                                                                                                                                                                                                                                                       |
| Setting                      | 5       | Describe the setting, locations, and relevant dates, including periods of recruitment, exposure, follow-up, and data collection                                                                                                                                                                                                                                                                               |
| Participants                 | 6       | (a) Give the eligibility criteria, and the sources and methods of selection of participants. Describe methods of follow-up<br>(b) For matched studies, give matching criteria and number of exposed and unexposed                                                                                                                                                                                             |
| Variables                    | 7       | Clearly define all outcomes, exposures, predictors, potential confounders, and effect modifiers. Give diagnostic criteria, if applicable                                                                                                                                                                                                                                                                      |
| Data sources/<br>measurement | 8*      | For each variable of interest, give sources of data and details of methods of assessment (measurement). Describe comparability of assessment methods if there is more than one group                                                                                                                                                                                                                          |
| Bias                         | 9       | Describe any efforts to address potential sources of bias                                                                                                                                                                                                                                                                                                                                                     |
| Study size                   | 10      | Explain how the study size was arrived at                                                                                                                                                                                                                                                                                                                                                                     |
| Quantitative variables       | 11      | Explain how quantitative variables were handled in the analyses. If applicable, describe which groupings were chosen and why                                                                                                                                                                                                                                                                                  |
| Statistical methods          | 12      | (a) Describe all statistical methods, including those used to control for confounding<br>(b) Describe any methods used to examine subgroups and interactions<br>(c) Explain how missing data were addressed<br>(d) If applicable, explain how loss to follow-up was addressed<br>(e) Describe any sensitivity analyses                                                                                        |
| <b>Results</b>               |         |                                                                                                                                                                                                                                                                                                                                                                                                               |
| Participants                 | 13*     | (a) Report numbers of individuals at each stage of study—eg numbers potentially eligible, examined for eligibility, confirmed eligible, included in the study, completing follow-up, and analysed<br>(b) Give reasons for non-participation at each stage<br>(c) Consider use of a flow diagram                                                                                                               |
| Descriptive data             | 14*     | (a) Give characteristics of study participants (eg demographic, clinical, social) and information on exposures and potential confounders<br>(b) Indicate number of participants with missing data for each variable of interest<br>(c) Summarise follow-up time (eg, average and total amount)                                                                                                                |
| Outcome data                 | 15*     | Report numbers of outcome events or summary measures over time                                                                                                                                                                                                                                                                                                                                                |
| Main results                 | 16      | (a) Give unadjusted estimates and, if applicable, confounder-adjusted estimates and their precision (eg, 95% confidence interval). Make clear which confounders were adjusted for and why they were included<br>(b) Report category boundaries when continuous variables were categorized<br>(c) If relevant, consider translating estimates of relative risk into absolute risk for a meaningful time period |

|    |                          |    |                                                                                        |
|----|--------------------------|----|----------------------------------------------------------------------------------------|
| 1  | Other analyses           | 17 | Report other analyses done—eg analyses of subgroups and interactions, and              |
| 2  |                          |    | sensitivity analyses                                                                   |
| 3  |                          |    |                                                                                        |
| 4  | <b>Discussion</b>        |    |                                                                                        |
| 5  | Key results              | 18 | Summarise key results with reference to study objectives                               |
| 6  |                          |    |                                                                                        |
| 7  | Limitations              | 19 | Discuss limitations of the study, taking into account sources of potential bias or     |
| 8  |                          |    | imprecision. Discuss both direction and magnitude of any potential bias                |
| 9  |                          |    |                                                                                        |
| 10 | Interpretation           | 20 | Give a cautious overall interpretation of results considering objectives, limitations, |
| 11 |                          |    | multiplicity of analyses, results from similar studies, and other relevant evidence    |
| 12 | Generalisability         | 21 | Discuss the generalisability (external validity) of the study results                  |
| 13 |                          |    |                                                                                        |
| 14 | <b>Other information</b> |    |                                                                                        |
| 15 | Funding                  | 22 | Give the source of funding and the role of the funders for the present study and, if   |
| 16 |                          |    | applicable, for the original study on which the present article is based               |
| 17 |                          |    |                                                                                        |

18  
19 \*Give information separately for exposed and unexposed groups.

20  
21 **Note:** An Explanation and Elaboration article discusses each checklist item and gives methodological background and  
22 published examples of transparent reporting. The STROBE checklist is best used in conjunction with this article (freely  
23 available on the Web sites of PLoS Medicine at <http://www.plosmedicine.org/>, Annals of Internal Medicine at  
24 <http://www.annals.org/>, and Epidemiology at <http://www.epidem.com/>). Information on the STROBE Initiative is  
25 available at <http://www.strobe-statement.org>.  
26  
27  
28  
29  
30  
31  
32  
33  
34  
35  
36  
37  
38  
39  
40  
41  
42  
43  
44  
45  
46  
47  
48  
49  
50  
51  
52  
53  
54  
55  
56  
57  
58  
59  
60



**DERIVATION AND VALIDATION OF A CLINICAL PREDICTION  
RULE FOR DELIRIUM IN PATIENTS ADMITTED TO A  
MEDICAL WARD: AN OBSERVATIONAL STUDY.**

|                                    |                                                                                                                                                                                                                                                   |
|------------------------------------|---------------------------------------------------------------------------------------------------------------------------------------------------------------------------------------------------------------------------------------------------|
| Journal:                           | <i>BMJ Open</i>                                                                                                                                                                                                                                   |
| Manuscript ID:                     | bmjopen-2012-001599.R1                                                                                                                                                                                                                            |
| Article Type:                      | Research                                                                                                                                                                                                                                          |
| Date Submitted by the Author:      | 16-Jul-2012                                                                                                                                                                                                                                       |
| Complete List of Authors:          | Urreta, Iratxe<br>Emparanza, Jose Ignacio; Osakidetza,<br>Martinez, Juan Antonio<br>Basabe, Iban; Osakidetza,<br>Belastegui, Ana; Osakidetza,<br>Aguirre, Cristina; Osakidetza,<br>Goikoetxea, Xabier; Osakidetza,<br>Liceaga, Nerea; osakidetza, |
| <b>Primary Subject<br>Heading</b>: | Medical management                                                                                                                                                                                                                                |
| Secondary Subject Heading:         | Neurology                                                                                                                                                                                                                                         |
| Keywords:                          | Delirium, clinical prediction rule, elderly                                                                                                                                                                                                       |
|                                    |                                                                                                                                                                                                                                                   |

SCHOLARONE™  
Manuscripts

Only

STROBE Statement—Checklist of items that should be included in reports of *cohort studies*

|                              | Item No | Recommendation                                                                                                                                                                                                                                                                                                                                                                                                |
|------------------------------|---------|---------------------------------------------------------------------------------------------------------------------------------------------------------------------------------------------------------------------------------------------------------------------------------------------------------------------------------------------------------------------------------------------------------------|
| <b>Title and abstract</b>    | 1       | (a) Indicate the study's design with a commonly used term in the title or the abstract<br>(b) Provide in the abstract an informative and balanced summary of what was done and what was found                                                                                                                                                                                                                 |
| <b>Introduction</b>          |         |                                                                                                                                                                                                                                                                                                                                                                                                               |
| Background/rationale         | 2       | Explain the scientific background and rationale for the investigation being reported                                                                                                                                                                                                                                                                                                                          |
| Objectives                   | 3       | State specific objectives, including any prespecified hypotheses                                                                                                                                                                                                                                                                                                                                              |
| <b>Methods</b>               |         |                                                                                                                                                                                                                                                                                                                                                                                                               |
| Study design                 | 4       | Present key elements of study design early in the paper                                                                                                                                                                                                                                                                                                                                                       |
| Setting                      | 5       | Describe the setting, locations, and relevant dates, including periods of recruitment, exposure, follow-up, and data collection                                                                                                                                                                                                                                                                               |
| Participants                 | 6       | (a) Give the eligibility criteria, and the sources and methods of selection of participants. Describe methods of follow-up<br>(b) For matched studies, give matching criteria and number of exposed and unexposed                                                                                                                                                                                             |
| Variables                    | 7       | Clearly define all outcomes, exposures, predictors, potential confounders, and effect modifiers. Give diagnostic criteria, if applicable                                                                                                                                                                                                                                                                      |
| Data sources/<br>measurement | 8*      | For each variable of interest, give sources of data and details of methods of assessment (measurement). Describe comparability of assessment methods if there is more than one group                                                                                                                                                                                                                          |
| Bias                         | 9       | Describe any efforts to address potential sources of bias                                                                                                                                                                                                                                                                                                                                                     |
| Study size                   | 10      | Explain how the study size was arrived at                                                                                                                                                                                                                                                                                                                                                                     |
| Quantitative variables       | 11      | Explain how quantitative variables were handled in the analyses. If applicable, describe which groupings were chosen and why                                                                                                                                                                                                                                                                                  |
| Statistical methods          | 12      | (a) Describe all statistical methods, including those used to control for confounding<br>(b) Describe any methods used to examine subgroups and interactions<br>(c) Explain how missing data were addressed<br>(d) If applicable, explain how loss to follow-up was addressed<br>(e) Describe any sensitivity analyses                                                                                        |
| <b>Results</b>               |         |                                                                                                                                                                                                                                                                                                                                                                                                               |
| Participants                 | 13*     | (a) Report numbers of individuals at each stage of study—eg numbers potentially eligible, examined for eligibility, confirmed eligible, included in the study, completing follow-up, and analysed<br>(b) Give reasons for non-participation at each stage<br>(c) Consider use of a flow diagram                                                                                                               |
| Descriptive data             | 14*     | (a) Give characteristics of study participants (eg demographic, clinical, social) and information on exposures and potential confounders<br>(b) Indicate number of participants with missing data for each variable of interest<br>(c) Summarise follow-up time (eg, average and total amount)                                                                                                                |
| Outcome data                 | 15*     | Report numbers of outcome events or summary measures over time                                                                                                                                                                                                                                                                                                                                                |
| Main results                 | 16      | (a) Give unadjusted estimates and, if applicable, confounder-adjusted estimates and their precision (eg, 95% confidence interval). Make clear which confounders were adjusted for and why they were included<br>(b) Report category boundaries when continuous variables were categorized<br>(c) If relevant, consider translating estimates of relative risk into absolute risk for a meaningful time period |

|                          |    |                                                                                                                                                                            |
|--------------------------|----|----------------------------------------------------------------------------------------------------------------------------------------------------------------------------|
| Other analyses           | 17 | Report other analyses done—eg analyses of subgroups and interactions, and sensitivity analyses                                                                             |
| <b>Discussion</b>        |    |                                                                                                                                                                            |
| Key results              | 18 | Summarise key results with reference to study objectives                                                                                                                   |
| Limitations              | 19 | Discuss limitations of the study, taking into account sources of potential bias or imprecision. Discuss both direction and magnitude of any potential bias                 |
| Interpretation           | 20 | Give a cautious overall interpretation of results considering objectives, limitations, multiplicity of analyses, results from similar studies, and other relevant evidence |
| Generalisability         | 21 | Discuss the generalisability (external validity) of the study results                                                                                                      |
| <b>Other information</b> |    |                                                                                                                                                                            |
| Funding                  | 22 | Give the source of funding and the role of the funders for the present study and, if applicable, for the original study on which the present article is based              |

\*Give information separately for exposed and unexposed groups.

**Note:** An Explanation and Elaboration article discusses each checklist item and gives methodological background and published examples of transparent reporting. The STROBE checklist is best used in conjunction with this article (freely available on the Web sites of PLoS Medicine at <http://www.plosmedicine.org/>, Annals of Internal Medicine at <http://www.annals.org/>, and Epidemiology at <http://www.epidem.com/>). Information on the STROBE Initiative is available at <http://www.strobe-statement.org>.

1  
2  
3  
4  
5  
6 **DERIVATION AND VALIDATION OF A CLINICAL PREDICTION RULE FOR**  
7 **DELIRIUM IN PATIENTS ADMITTED TO A MEDICAL WARD: AN**  
8 **OBSERVATIONAL STUDY.**  
9  
10

11  
12  
13  
14  
15 J Martinez RN<sup>1</sup>, A Belastegui RN<sup>1</sup>, I Basabe MD<sup>1</sup>, X Goicoechea MD<sup>1</sup>, C Agirre  
16 MD<sup>1</sup>, N Lizeaga RN<sup>1</sup>, I Urreta MD<sup>2</sup>, JI Emparanza **PhMD**<sup>3</sup>.  
17  
18

19  
20 <sup>1</sup> Dept. of Internal Medicine, Donostia University Hospital, Spain  
21

22  
23 <sup>2</sup> Clinical Epidemiology Unit, Critical Appraisal Skills Programme – Spain  
24 (CASPe), Donostia University Hospital, Spain  
25

26  
27 <sup>3</sup> Clinical Epidemiology Unit, CIBER-ESP & CASPe, Donostia University  
28 Hospital, Spain  
29  
30

31  
32  
33  
34 Corresponding author:  
35

36  
37 I Urreta  
38

39  
40 Email: iratxe.urretabarallobre@osakidetza.net  
41  
42  
43  
44  
45  
46  
47  
48  
49  
50  
51  
52  
53  
54  
55  
56  
57  
58  
59  
60

1



## Copyright

The Corresponding Author has the right to grant on behalf of all authors and does grant on behalf of all authors, a worldwide licence to the Publishers and its licensees in perpetuity, in all forms, formats and media (whether known now or created in the future), to i) publish, reproduce, distribute, display and store the Contribution, ii) translate the Contribution into other languages, create adaptations, reprints, include within collections and create summaries, extracts and/or, abstracts of the Contribution, iii) create any other derivative work(s) based on the Contribution, iv) to exploit all subsidiary rights in the Contribution, v) the inclusion of electronic links from the Contribution to third party material where-ever it may be located; and, vi) ~~licene~~license any third party to do any or all of the above.”

1  
2  
3  
4  
5  
6  
7 **~~What is already known on this topic~~**

8 ~~Delirium is a common and serious disorder associated with morbidity and~~  
9 ~~mortality in patients admitted to acute medical wards.~~

10  
11  
12  
13 ~~The rules published so far have limited applicability in a busy medicine unit.~~

14  
15  
16 **~~What this study adds~~**

17  
18  
19 ~~A new clinical prediction rule for delirium has been developed and validated.~~

20  
21  
22 ~~This is a simple clinical prediction rule based on easily measurable variables.~~

23  
24  
25 ~~This rule may facilitate early identification of high risk patients and target early~~  
26 ~~initiation of preventive measures.~~

## ABSTRACT

**Objectives:** To develop and validate a simple clinical prediction rule, based on variables easily measurable at admission, to identify patients at high risk of developing delirium during their hospital stay on an internal medicine ward.

**Design:** Prospective study of two cohorts of patients admitted between May 1<sup>st</sup> and June 30<sup>th</sup> 2008 (derivation cohort), and between May 1<sup>st</sup> and June 30<sup>th</sup> 2009 (validation cohort).

**Setting:** A tertiary hospital in Donostia-Gipuzkoa (Spain)

**Participants:** 397 patients participated in the study. The mean age and prevalence of delirium were 75.9 years and 13% respectively in the derivation cohort, and 75.8 years and 25% in the validation cohort.

**Main outcome measures:** The predictive variables analysed and finally included in the rule were: being aged 85 years old or older, being dependent in 5 or more activities of daily living, and taking 2 or more psychotropic drugs (antipsychotics, benzodiazepines, antidepressants, anticonvulsant, and/or antimentia drugs). The variable of interest was delirium as defined by the short Confusion Assessment Method, which assesses four characteristics: acute onset and fluctuating course, inattention, disorganised thinking, and altered level of consciousness.

**Results:** We developed a rule in which the individual risk of delirium is obtained by adding 1 point for each criterion met (age $\geq$ 85, high level of dependence, and being on psychotropic medication). The result is considered positive if the score is  $\geq$  1. The rule accuracy was: sensitivity = 93.4% (95% CI: 85.5-97.2),

1  
2  
3  
4  
5  
6 specificity = 60.6% (95% CI: 54.1-66.8), PPV = 44.4% (95% CI: 36.9-52.1), and  
7  
8 NPV = 96.5% (95% CI: 92-98.5). The area under the ROC curve was 0.85 for  
9  
10 the validation cohort.

11  
12 **Conclusions:** The presence or absence of any of the three predictive factors  
13  
14 (age $\geq$ 85, high level of dependence, and psychotropic medication) allowed us to  
15  
16 classify patients on internal medicine wards according to the risk of developing  
17  
18 delirium. The simplicity of the variables in our clinical prediction rule means that  
19  
20 the data collection required is feasible in busy medicine units.  
21  
22  
23  
24  
25  
26  
27  
28  
29  
30  
31  
32  
33  
34  
35  
36  
37  
38  
39  
40  
41  
42  
43  
44  
45  
46  
47  
48  
49  
50  
51  
52  
53  
54  
55  
56  
57  
58  
59  
60

## Introduction:

Delirium, also referred to as acute confusional state, is an acute disturbance of attention and cognition with a fluctuating course that often appears in hospitalised patients. Between 10% and 30% of patients admitted to general hospitals develop delirium,<sup>1-3</sup> with a prevalence of up to 60% among frail elderly patients.<sup>4</sup> It is a serious complication that increases mortality<sup>5</sup> and reduces the functional status of patients,<sup>6</sup> as well as increasing the length of hospital stays<sup>7-8</sup> and rates of readmission.<sup>9</sup> While the pathophysiology of delirium remains poorly understood, multiple risk factors have been identified.<sup>10</sup> These can be classified into two groups: factors that increase baseline vulnerability (presence of dementia, cerebrovascular accident, Parkinson's disease, old age, and sensory impairment, among others),<sup>11</sup> and those that may be a trigger (such as polypharmacy, infection, and dehydration).<sup>12-14</sup>

Various interventions to improve modifiable variables have been found effective in preventing the occurrence of delirium.<sup>15-18</sup> ~~Therefore, Therefore;~~ the identification of patients at high risk of developing delirium is particularly important.<sup>19</sup>

Clinical prediction rules are useful tools for classifying patients at different levels of risk.<sup>20</sup> Other authors proposed a rule to predict the risk of developing delirium<sup>21</sup> for use in patients admitted due to clinical worsening of their condition, but its use has not become widespread in our setting since it requires variables that are difficult to measure on admission (Mini-Mental State Examination score, and visual acuity, among others).

1  
2  
3  
4  
5  
6 The objective of this study was to derive and validate a simple clinical prediction  
7 rule, based on variables that are easily measurable and are often routinely  
8 taken on admission, to identify patients at high risk of developing delirium during  
9 their hospital stay on an internal medicine ward.  
10  
11  
12

13  
14 The identification of these patients will allow us to introduce the necessary  
15 preventative measures.  
16  
17  
18  
19  
20  
21  
22  
23  
24  
25  
26  
27  
28  
29  
30  
31  
32  
33  
34  
35  
36  
37  
38  
39  
40  
41  
42  
43  
44  
45  
46  
47  
48  
49  
50  
51  
52  
53  
54  
55

56 7  
57  
58  
59  
60

## Methods

### *Design*

To develop the clinical prediction rule we assessed a prospective cohort of consecutive patients admitted in four internal medicine wards. Subsequently, we assessed a different prospective cohort of consecutive patients to validate the rule.

### *Patients*

The derivation cohort was 397 consecutive patients aged 18 years or over, of both sexes, who were admitted to any of four internal medicine wards at Donostia Hospital between May 1<sup>st</sup> 2008 and June 30<sup>th</sup> 2008, and we used no other exclusion criteria. The following year, between May 1<sup>st</sup> 2009 and June 30<sup>th</sup> 2009, we recruited the validation cohort on the same basis: 302 consecutive patients aged 18 or over, of both sexes, who were admitted to any of the same four internal medicine wards at the hospital. The consent was obtained from the study participants and all patients gave their consent to participate in the study.

Formatted: Line spacing: Double

Formatted: Font: 12 pt

### *Assessment of delirium*

We defined delirium using the short version of the Confusion Assessment Method<sup>22</sup>; a short form for assessing confusion. This diagnostic algorithm assesses four characteristics: 1) acute onset and fluctuating course, 2)

1  
2  
3  
4  
5  
6 inattention, 3) disorganised thinking, and 4) altered level of consciousness. The  
7  
8 diagnosis of delirium required the presence of 1) and 2), and either 3) or 4) (or  
9  
10 both). This assessment was performed by two independent researchers, when  
11  
12 it was considered that patients were ready for discharge, after analysis of any  
13  
14 relevant data in their medical record and nursing report. Disagreements were  
15  
16 resolved by consensus with a third researcher. All these evaluators were  
17  
18 blinded to the potential predictive variables selected for the study.  
19  
20

### 21 22 23 *Potential predictors*

24  
25  
26 The potential predictive variables for delirium were selected after a systematic  
27  
28 review of the literature<sup>10-14 23-25</sup>. We sought to identify variables that were easy  
29  
30 to measure and are often routinely recorded on admission to these wards.  
31

32  
33 The following variables were selected and measured on admission: age (years),  
34  
35 sex, systolic blood pressure (mmHg), heart rate (beats/min), respiratory rate  
36  
37 (breaths/minute), axillary temperature (°C), oxygen therapy (no: not used; and  
38  
39 yes: oxygen with nasal cannula, mask, and/or oxygen at home), fluid therapy,  
40  
41 presence of urinary catheter, level of consciousness (normal: alert; or altered:  
42  
43 drowsiness, unresponsiveness to voice, unresponsiveness to pain, and/or  
44  
45 generally unresponsive), diagnosis of infection at admission (respiratory, urinary  
46  
47 or other types of infections; or no infection: any other cause of admission),  
48  
49 admission in the previous year, admission in the previous month, hearing  
50  
51 impairment (use of a hearing aid, or deafness reported by the patient or  
52  
53 caregiver), vision impairment (regular use of glasses or reduction in visual  
54  
55 acuity reported by the patient or caregiver), and dementia (in a medical report or  
56

57  
58  
59  
60  
9



1  
2  
3  
4  
5  
6 reported by the caregiver). In addition, blood tests were taken on admission to  
7  
8 measure the following: haematocrit (%), levels of urea (mg/dl), creatinine  
9  
10 (mg/dl), sodium (mEq/l), potassium (mEq/l), and glucose (mg/dl), as well as  
11  
12 white blood cell ( $10^3/\mu\text{l}$ ) and neutrophil ( $10^3/\mu\text{l}$ ) counts. Lastly, certain  
13  
14 characteristics of patients prior to admission were also assessed: level of  
15  
16 dependence for activities of daily living (personal hygiene and grooming,  
17  
18 dressing and undressing, getting onto or off toilet, ambulation, bowel and  
19  
20 bladder control, and self-feeding) as dichotomous variables (dependent;  
21  
22 independent); presence of pressure ulcers, and excess alcohol intake ( $>60$   
23  
24 g/ethanol/day), as well as use of certain types of medication: benzodiazepines,  
25  
26 antidepressants, antidementia drugs, antipsychotics, anti-Parkinson's drugs, or  
27  
28 anticonvulsants.  
29  
30  
31  
32

### 33 *Statistical analysis*

34  
35  
36 A descriptive analysis was carried out, based on the calculation of means and  
37  
38 standard deviations for continuous variables, and absolute or relative  
39  
40 frequencies as percentages for categorical variables. Subsequently, some  
41  
42 continuous variables were dichotomised using the median value.  
43

### 44 *Sample size*

45  
46  
47 Assuming a prevalence of delirium at admission of 10%, it was calculated that  
48  
49 we needed 10 patients with delirium for each variable included in the model,  
50  
51 with the intention that the model should be as parsimonious as possible.  
52  
53  
54  
55  
56  
57  
58  
59  
60

### *Comparison between derivation and validation cohorts*

We compared the characteristics of patients in the derivation cohort with those in the validation cohort using the Student's t-test for continuous variables and the Chi square test for ordinal and dichotomous variables.

### *Derivation of the prediction rule*

The characteristics of patients who developed delirium were compared with those of patients who did not, again using the Student's t-test or the Chi square test as appropriate. A p-value  $<0.25$  was taken to indicate potentially predictive variables and those meeting this criteria were included in the multivariate model. Then, using a stepwise logistic regression model we selected the terms (predictive variables) to be included in the final model. The criteria for entry in the model and for removal were  $p \leq 0.05$  and  $p \geq 0.10$  respectively. The Hosmer Lemeshow test was performed to assess the goodness of fit of this model.

We note that we also explored selecting variables for an alternative prediction rule by recursive partitioning. However, as the performance of this rule was poorer than that of the rule obtained by logistic regression, we decided to report exclusively the data concerning the rule derived using the latter method.

### *Validation cohort and model performance*

The clinical prediction rule was applied to the validation cohort. We report the incidence of delirium as a function of score on the rule and the ORs using the

1  
2  
3  
4  
5  
6 lowest risk category as the reference. The performance of the rule in the two  
7  
8 cohorts was explored using ROC curve analysis.  
9

10  
11 To assess the diagnostic accuracy of the rule, we constructed a 2x2 table for  
12  
13 calculation of the following: sensitivity, specificity, and positive and negative  
14  
15 predictive values. The 95% confidence intervals of these indicators were also  
16  
17 calculated assuming a binomial distribution.  
18

19 We used SPSS 19.0 and MedCalc for all the analysis.  
20  
21  
22  
23  
24  
25  
26  
27  
28  
29  
30  
31  
32  
33  
34  
35  
36  
37  
38  
39  
40  
41  
42  
43  
44  
45  
46  
47  
48  
49  
50  
51  
52  
53  
54  
55

## Results

In the validation cohort, 13% of patients (52 out of 397) developed delirium, and in the derivation cohort the prevalence was 25.2% (76 out 302). Table 1 summarises baseline characteristics of the derivation and validation cohorts. Patients included in our study were elderly ( $76.4 \pm 13.3$  years old) and slightly more than half were women (52%, 362 out of 699). The derivation and validation cohorts were similar in some respects, namely, age, sex, mean length of stay, and types of medication. On the other hand, patients in the validation cohort were significantly more dependant in certain activities of daily living: personal hygiene and grooming, dressing and undressing, and getting onto or off toilet.

Tables 2 to 6 report the results of the univariate analysis in which the risk factors were compared between patients who developed delirium and those who did not within the derivation cohort. Those who developed delirium were significantly older and had slightly higher respiratory rates, but there were no significant differences in blood test results.

Age was dichotomised using a cut-off of 85 years, a value that was found to have a sensitivity of 85% and a specificity of 56% for delirium by the ROC curve analysis. We found that the risk of delirium associated with the types of medication considered was similar for all except antipsychotic drugs, for which the risk was twice as high. Accordingly, the medication data was coded according to the number of different drugs patients were taking at admission with each antidepressant, antedementia, or anticonvulsant drug contributing equally, while antipsychotic drugs were weighted by a factor of two. The

1  
2  
3  
4  
5  
6 activities of daily living data were also dichotomised with a cut-off of reported  
7 impairments in five activities.  
8

9  
10 The scores for the clinical prediction rule were assigned on the basis of  
11 regression coefficients obtained in the logistic regression model (Table 7). One  
12 point was given to patients older than 85 years, to those who had 2 or more  
13 points in the variable drugs, and to those with impairments in five or more of the  
14 activities of daily living considered. Therefore, the total score for the rule ranged  
15 between 0 and 3.  
16  
17  
18  
19  
20  
21

22  
23 The patients with delirium of the two cohorts scored similarly: 17% and 7%  
24 scored 0, 48% and 30% scored  $\leq 1$  and 85% and 85% scored  $\leq 2$  in the  
25 derivation and validation cohort respectively.  
26  
27  
28  
29  
30  
31

Formatted: Font: 12 pt

Formatted: Line spacing: Double

32 Table 9 and Figures 1 and 2 describe the performance of the rule in the  
33 derivation and validation cohorts. In both cohorts, we observed higher rates of  
34 delirium associated with higher scores on the rule, the model having a good  
35 predictive power for the validation cohort (area under the ROC curve, AUC =  
36 0.85). In contrast with what would be expected, the values obtained in the  
37 validation cohort are better than those obtained in the derivation cohort, and this  
38 is probably related to the higher prevalence of delirium in validation group.  
39  
40  
41  
42  
43  
44  
45

46 In particular, Table 9 lists the sensitivity (Se) and specificity (Sp), as well as the  
47 positive and negative predictive values (PPVs and NPVs) obtained when the  
48 rule was dichotomised as negative (a score of 0) or positive (as score of  $\geq 1$ ).  
49 For the validation cohort, the Se, Sp, NPV, and PPV were 93.4%, 60.6%, 96%,  
50 and 44% respectively  
51  
52  
53  
54  
55

56  
57 14  
58  
59  
60

## DISCUSSION

In this prospective study, we identified three independent predictive factors for delirium: being 85 years old or older, being dependent in five or more activities of daily living (of the six considered), and taking psychotropic drugs (antipsychotics, benzodiazepines, antidepressants, anticonvulsants, and/or antidementia drugs). With these factors we developed a clinical prediction rule in which an individual risk score for delirium is obtained by adding 1 point for each of the factors present. Applying this rule, patients are classified as positive if they have a total score of 1 or more. ~~Selecting the cut-off point for the highest sensitivity, the accuracy of the rule was: Se=93.4% (95% CI 85.5 to 97.2), Sp=60.6% (95% CI 54.1 to 66.8), PPV = 44.4% (95% CI 36.9 to 52.1), and a NPV = 96.5% (95% CI 92 to 98.5). The AUCs were 0.77 and 0.85 in the derivation and validation cohorts, respectively.~~

In the derivation cohort, 13% of patients developed delirium, while the prevalence was somewhat higher, 25%, in the validation cohort. Patients were elderly (mean ages in the derivation and validation cohorts were 75.9 +/- 13.3 years and 76.8 +/- 13.3 years respectively), and there were slightly more women (52%). The mean length of hospital stay was 8 +/- 5.8 days and overall mortality was 5%. ~~There is a significant difference in the ADL variables being those from the validation cohort more dependent than the derivation cohort. All the above mention variables explain the almost two fold discrepancy in the incidence of delirium between the two cohort.~~

15

Formatted: Left

Formatted: Font: 12 pt

Formatted: Font: 12 pt

1  
2  
3  
4  
5  
6 There are multiple factors for the development of delirium, the predisposing and  
7 triggering factors being well defined. The predisposing factors are mostly  
8 related to degenerative brain disease (dementia, arteriosclerosis, Parkinson's  
9 disease, and depression).<sup>10 11</sup> On the other hand, there are a diverse range of  
10 triggering factors, in particular, medication, the presence of infection, surgery,  
11 metabolic disorders, and water-electrolyte imbalances, among others.<sup>13 14 23-25</sup>  
12  
13  
14  
15  
16  
17

18 In the present study, we have only explored variables that are readily available  
19 on admission, in order to use the predictive rule at that stage and be able to  
20 introduce preventative measures immediately in high-risk patients. These would  
21 include trying to avoid triggering factors for the development of delirium (such  
22 as changes of room/ward, unnecessary catheterisation, inadequate oral  
23 hydration, and polypharmacy).  
24  
25  
26  
27  
28  
29

30 Interestingly, the factors found to be good predictors for the development of  
31 delirium in our study (age $\geq$ 85, high level of dependence, and being on  
32 psychotropic medication), to some extent, indirectly reflect the severity of the  
33 organic brain damage in patients with delirium.  
34  
35  
36  
37  
38

39 Another predictive rule for delirium in this type of patients has been published<sup>21</sup>  
40 (~~21~~) but showed a significantly lower performance than that we obtained (AUC  
41 = 0.66 [0.55-0.77] vs. AUC=0.85 [0.80-0.90] with our rule). Further, in our  
42 opinion, it is also more difficult to apply than the rule we propose. The simplicity  
43 of the variables included in our rule makes data collection a feasible task for  
44 busy healthcare units.  
45  
46  
47  
48  
49  
50

51 Between 10% and 60% of patients admitted to hospital develop delirium,  
52 depending on the type of patient, the prevalence in frail elderly patients being at  
53  
54  
55

56  
57 16  
58  
59  
60

1  
2  
3  
4  
5  
6 the top of this range. In our study, it was 13% and 25% in the derivation and  
7  
8 validations cohorts, respectively. Delirium is well known to be difficult to  
9  
10 diagnose and a wide range of instruments have been developed to help detect  
11  
12 the condition.<sup>26 27</sup> ~~(26,27)~~ We used the Confusion Assessment Method<sup>22</sup> that  
13  
14 has a sensitivity of 96% (95% CI 80-100%) and a specificity of 93% (95% CI 84-  
15  
16 100%). In our study, the doctors in charge of the diagnosis of delirium were  
17  
18 specialists in internal medicine, with considerable training and experience in the  
19  
20 management of this type of patients, any differences being resolved by  
21  
22 consensus with a third specialist. We note, however, that the diagnoses of  
23  
24 delirium were not confirmed by a psychiatrist. This may partially explain the low  
25  
26 prevalence of delirium in our patients, that is, it may be that only the most  
27  
28 clinically striking cases, those which required pharmacological treatment, were  
29  
30 recognised.

31  
32 The association between delirium and an increase of morbidity and mortality<sup>5 6 9</sup>  
33  
34 is well known, as are the effectiveness of preventive measures to avoid the  
35  
36 development of the disease.<sup>15-18</sup> The use of the proposed predictive rule would  
37  
38 allow us to classify around half of our inpatients (53%) as high-risk. Taking  
39  
40 preventative measures in this high risk group, up to 93.4% of those who  
41  
42 developed delirium in our study would have been covered by the measures and  
43  
44 might not have then developed the condition.

45  
46  
47 It would be interesting for the clinical predictive rule we propose to be validated  
48  
49 in other cohorts of frail elderly patients with worsening of multiple medical  
50  
51 conditions to check its external validity.



1  
2  
3  
4  
5  
6 **ACKNOWLEDGEMENTS:** We would like to thank all the medical and nursing  
7  
8 staff of the Department of Internal Medicine at Donostia University Hospital for  
9  
10 their contribution to the study.

11  
12 **CONTRIBUTORS:** JM, AB, JIE and IU participated in the design of the study.  
13  
14 JM, AB, IB, XG, CA and NL collected all data. JIE and IU carried out the  
15  
16 statistical analysis. JM, IU and JIE drafted the manuscript. All authors approved  
17  
18 the final version to be published. IU and JM are the guarantors.

19  
20  
21 **COMPETING INTERESTS:** All authors have completed the Unified Competing  
22  
23 interests form at [http://www.icmje.org/coi\\_disclosure.pdf](http://www.icmje.org/coi_disclosure.pdf) (available on request  
24  
25 from the corresponding author) and declare: no support from any organisation  
26  
27 for the submitted work; no financial relationships with any organisations that  
28  
29 might have an interest in the submitted work in the previous three years; and no  
30  
31 other relationships or activities that could appear to have influenced the  
32  
33 submitted work.

34  
35 **ETHICAL APPROVAL:** The design was evaluated and then approved by the  
36  
37 Clinical Research Ethics Committee of the Gipuzkoa Health region.  
38  
39  
40  
41  
42  
43  
44  
45  
46  
47  
48  
49  
50  
51  
52  
53  
54  
55

**REFERENCES:**

1) Cole MG, Ciampi A, Belzile E, Zhong L. Persistent delirium in older hospital patients: a systematic review of frequency and prognosis. *Age Ageing*. 2009; 38: 19-26

2) Trzepacz PT. Delirium. *Advances in diagnosis, pathophysiology, and treatment. Psychiatric Clinics of North America* 1996; 19 (3): 429-448.

3) Leentjens AF, van der Mast RC. Delirium in elderly people: an update. *Curr Opin Psychiatry*. 2005 May; 18 (3): 325-330.

4) Witlox J, Eurelings LS, de Jonghe JF, Kalisvaart KJ, Eikelenboom P, van Gool WA. Delirium in elderly patients and the risk of postdischarge mortality, institutionalization, and dementia: a meta-analysis. *JAMA*. 2010; 304: 443-451.

5) McCusker J, Cole M, Abrahamowicz M, Primeau F, Belzile E. Delirium predicts 12-month mortality. *Archives of Internal Medicine* 2002; 162 (4): 457-463.

6) Moller JT, Cluitmans P, Rasmussen LS, Houx P, Rasmussen H, Canet J, et al. Long-term postoperative cognitive dysfunction in the elderly ISPOCD1 study. ISPOCD investigators. *International Study of Post-Operative Cognitive Dysfunction. Lancet* 1998; 351 (9106): 857-861.

7) McCusker J, Cole MG, Dendukuri N, Belzile E. Does delirium increase hospital stay? *Journal of the American Geriatrics Society* 2003 51 (11):1539-1546.

19

1  
2  
3  
4  
5  
6  
7  
8  
9 8) Stevens LE, de Moore GM, Simpson JM. Delirium in hospital: does it  
10 increase length of stay? Australian & New Zealand Journal of Psychiatry 1998;  
11 32 (6): 805-808.  
12

13  
14  
15  
16 9) Inouye SK, Rushing JT, Foreman MD, Palmer RM, Pompei P. Does delirium  
17 contribute to poor hospital outcomes? A three-site epidemiologic study. Journal  
18 of General Internal Medicine 1998; 13: 234-242.  
19

20  
21  
22  
23 10) Inouye SK. Delirium in hospitalized older patients: recognition and risk  
24 factors. Journal of Geriatric Psychiatry & Neurology 1998; 11 (3): 118-125;  
25 discussion 157-158.  
26  
27

28  
29  
30 11) Fick DM; Agostini JV; Inouye SK. Delirium superimposed on dementia: a  
31 systematic review. J Am Geriatr Soc 2002; 50 (10):1723-1732.  
32

33  
34  
35 12) Inouye SK, Charpentier PA. Precipitating factors for delirium in hospitalized  
36 elderly persons. Predictive model and interrelationship with baseline  
37 vulnerability. JAMA. 1996; 275 (11): 852-857.  
38

39  
40  
41 13) Laurila JV, Laakkonen ML, Tilvis RS, Pitkala KH. Predisposing and  
42 precipitating factors for delirium in a frail geriatric population. J Psychosom  
43 Res. 2008 Sep; 65 (3): 249-254.  
44  
45

46  
47  
48 14) Van Rompaey B, Schuurmans MJ, Shortridge-Baggett LM, Truijen S,  
49 Bossaert L. Risk factors for intensive care delirium: a systematic review.  
50 Intensive Crit Care Nurs. 2008 Apr; 24 (2):98-107.  
51

52  
53  
54  
55  
56  
57 20  
58  
59  
60

1  
2  
3  
4  
5  
6 15) Inouye, S, Bogardus, ST, Charpentier, PA, et al. A multicomponent  
7 intervention to prevent delirium in hospitalized older patients. *N Engl J Med*  
8 1999; 340: 669-676.  
9

10  
11  
12 16) Milisen K, Lemiengre J, Braes T, Foreman M D. Multicomponent  
13 intervention strategies for managing delirium in hospitalized older people:  
14 systematic review. *Journal of Advanced Nursing* 2005; 52 (1): 79-90  
15  
16

17  
18  
19 17) Vidan MT, Sanchez E, Alonso M, Montero B, Ortiz J, Serra JA. An  
20 Intervention Integrated into Daily Clinical Practice Reduces the Incidence of  
21 Delirium During Hospitalization in Elderly Patients. *J Am Geriatr Soc* 2009;  
22 57:2029–2036.  
23  
24

25  
26  
27 18) Siddiqi N, Holt R, Britton AM, Holmes J. Interventions for preventing  
28 delirium in hospitalised patients. *Cochrane Database of Systematic Reviews*  
29 2007, Issue 2. Art. No.: CD005563. DOI: 10.1002/14651858.CD005563.pub2.  
30  
31

32  
33 19) Leslie DL, Marcantonio ER, Zhang Y, Summer LLs, Intuye SK. One-Year  
34 Health Care Costs Associated With Delirium in the Elderly Population. *Arch*  
35 *Intern Med.* 2008;168 (1):27-32  
36  
37

38  
39 20) Laupacis A, Sekar N, Stiell IG. Clinical prediction rules. A review and  
40 suggested modifications of methodological standards. *JAMA.* 1997 Feb 12; 277  
41 (6):488-494.  
42  
43

44  
45  
46 21) Inouye SK, Viscoli CM, Horwitz RI, Hurst LD, Tinetti ME. A predictive model  
47 for delirium in hospitalized elderly medical patients based on admission  
48 characteristics. *Ann Intern Med.* 1993 Sep 15; 119 (6): 474-481.  
49  
50

1  
2  
3  
4  
5  
6 22) Inouye SK, van Dyck CH, Alessi CA, Balkin S, Siegal AP, Horwitz RI.  
7 Clarifying confusion: the confusion assessment method. A new method for  
8 detection of delirium. *Ann Intern Med.* 1990 Dec 15;113 (12):941-948.  
9

10  
11  
12  
13 23) Elie M, Cole MG, Primeau FJ, Bellavance F. Delirium risk factors in elderly  
14 hospitalized patients. *J Gen Intern Med.* 1998 Mar; 13 (3):204-212.  
15

16  
17  
18 24) Pisani, MA, Murphy, TE, Van Ness, PH, et al. Characteristics associated  
19 with delirium in older patients in a medical intensive care unit. *Arch Intern Med*  
20 2007; 167:1629-1634.  
21

22  
23  
24 25) McCusker, J, Cole, M, Abrahamowicz, M, et al. Environmental risk factors  
25 for delirium in hospitalized older people. *J Am Geriatr Soc* 2001; 49:1327-1334.  
26

27  
28  
29 26) Camilla L. Wong, MD, Jayna Holroyd-Leduc, MD, FRCPC, David L. Simel,  
30 MD, MHS, Sharon E. Straus, MD, MSc, FRCPC. Does This Patient Have  
31 Delirium? Value of Bedside Instruments. *JAMA.* 2010; 304 (7): 779-786  
32

33  
34  
35  
36 27) Moraga AV, Rodriguez-Pascual C. Accurate diagnosis of delirium in elderly  
37 patients. *Curr Opin Psychiatry.* 2007 May; 20 (3):262-267.  
38

**Table 1** Characteristics of patients in the derivation and validation cohorts

| <b>Characteristics</b>                              | <b>Derivation cohort<br/>(n=397)</b> | <b>Validation cohort<br/>(n= 302)</b> | <b>p</b> |
|-----------------------------------------------------|--------------------------------------|---------------------------------------|----------|
| Mean age (SD)                                       | 75.9 (13.3)                          | 76.8 (13.3)                           | N.S      |
| Mean length of stay (SD)                            | 8.4 (5.8)                            | 8 (6.1)                               | N.S      |
| Women (%)                                           | 197 (49.6)                           | 165 (54.3)                            | N.S      |
| <b>Medication (%)</b>                               |                                      |                                       |          |
| Benzodiazepines                                     | 162 (40.8)                           | 134 (44.4)                            | N.S      |
| Antidepressants                                     | 75 (18.9)                            | 74 (24.5)                             | N.S      |
| Antidementia drugs                                  | 20 (5)                               | 11 (3.6)                              | N.S      |
| antipsychotics                                      | 24 (6)                               | 21 (7)                                | N.S      |
| Anti-Parkinson's agents                             | 13 (3.3)                             | 6(2)                                  | N.S      |
| Anticonvulsants                                     | 20 (5)                               | 16 (5.3)                              | N.S      |
| <b>Dependence in activities of daily living (%)</b> |                                      |                                       |          |
| Personal hygiene and grooming                       | 155 (39)                             | 171 (56.6)                            | <0.05    |
| Dressing and undressing                             | 155 (39)                             | 174 (57.6)                            | <0.05    |
| Getting onto or off toilet                          | 146 (36.8)                           | 161 (53.3)                            | <0.05    |
| Ambulation                                          | 163 (41.1)                           | 166 (55)                              | <0.05    |
| Bowel and bladder control                           | 139 (35)                             | 122 (40.4)                            | N.S      |
| Self-feeding                                        | 109 (27.5)                           | 102 (33.8)                            | N.S      |

**Table 2** Derivation cohort: univariate analysis of patient clinical variables considered potential risk factors for delirium at admission. Mean (SD)

| Variables                              | Delirium     | No delirium  | p     |
|----------------------------------------|--------------|--------------|-------|
| Age (years)                            | 83.83 (9.8)  | 74.75 (13.4) | 0.000 |
| Blood pressure (mmHg)                  | 127.5 (27.1) | 132.3 (26.5) | 0.22  |
| Respiratory rate (breaths/min)         | 27.92 (9.6)  | 24.42 (6.6)  | 0.001 |
| Heart rate (beats/min)                 | 86.6 (23.8)  | 84.06 (22.5) | N.S   |
| Body temperature (°C)                  | 36.7 (0.7)   | 36.7 (0.8)   | N.S   |
| Women (%)                              | 26 (50)      | 171 (49.6)   | NS    |
| Excess alcohol intake (%)              | 2 (3.8)      | 19 (5.5)     | NS    |
| Mean length of stay in hospital (days) | 9.3 (6.6)    | 8.3 (5.6)    | N.S   |
| Admission in previous year (%)         | 26 (50)      | 152 (44.1)   | NS    |
| Admission in previous month (%)        | 8(15.1)      | 45 (84.9)    | NS    |

**Table 3** Derivation cohort: univariate analysis of patient blood test results at admission. Mean (SD)

| <b>Variables</b>                     | <b>Delirium</b> | <b>No delirium</b> | <b>p</b> |
|--------------------------------------|-----------------|--------------------|----------|
| Haematocrit (%)                      | 39.31 (7.6)     | 37.42 (6.5)        | 0.058    |
| Urea (mg/dl)                         | 62.3 (31.6)     | 60.3 (40.7)        | N.S      |
| Creatinine (mg/dl)                   | 1.14 (0.5)      | 1.25 (0.9)         | N.S      |
| Sodium (mEq/l)                       | 138.5 (5.6)     | 173.9 (5.5)        | N.S      |
| Potassium (mEq/l)                    | 5.2 (6.9)       | 4.8 (0.7)          | N.S      |
| Glucose (mg/dl)                      | 140.1 (66.3)    | 140.8 (78.8)       | N.S      |
| White blood cells<br>(10e3/ $\mu$ l) | 12.1 (12.2)     | 10.1(4.7)          | N.S      |
| Neutrophils<br>(10e3/ $\mu$ l)       | 9.8 (8.5)       | 10.8 (14.8)        | N.S      |



**Table 4** Derivation cohort: univariate analysis of patient medication prior to admission.

| Variables          | Delirium  | No delirium | p     |
|--------------------|-----------|-------------|-------|
| Antidepressants    | 16 (30.8) | 59 (17.1)   | 0.023 |
| Antidementia drugs | 5 (9.6)   | 15 (4.3)    | 0.16  |
| Antipsychotics     | 8 (15.4)  | 16 (4.6)    | 0.007 |
| Anticonvulsants    | 5 (9.6)   | 15 (4.3)    | 0.16  |
| Benzodiazepines    | 23 (44.2) | 139 (40.3)  | NS    |

**Table 5** Derivation cohort: variables characterising patient status on admission

| Variables              | Delirium  | No delirium | p     |
|------------------------|-----------|-------------|-------|
| Urinary catheter       | 13 (25)   | 37(10.7)    | NS    |
| Fluid therapy          | 29 (55.8) | 124 (35.9)  | 0.009 |
| Vision impairment      | 36 (69.2) | 192 (55.7)  | 0.072 |
| Hearing impairment     | 9 (17.3)  | 87 (25.2)   | NS    |
| Oxygen therapy         | 32 (61.5) | 202 (58.6)  | NS    |
| Pressure ulcers        | 3 (5.8)   | 25 (7.3)    | NS    |
| Level of consciousness | 5 (21.7)  | 18 (78.3)   | 0.20  |
| Dementia               | 18 (34.6) | 49 (14.2)   | 0.001 |
| Infection              | 28 (53.8) | 141(40.8)   | 0.097 |

**Table 6** Derivation cohort: univariate analysis of patient activities of daily living

| Variables                              | Delirium  | No delirium | p      |
|----------------------------------------|-----------|-------------|--------|
| Impaired personal hygiene and grooming | 39 (75)   | 116 (33.6)  | 0.0001 |
| Impaired dressing and undressing       | 38 (73.1) | 117 (33.9)  | 0.0001 |
| Impaired getting onto or off toilet    | 36 (69.2) | 110 (31.9)  | 0.001  |
| Impaired ambulation                    | 38 (73.1) | 125 (36.2)  | 0.001  |
| Impaired bowel and bladder control     | 36 (69.2) | 103 (29.9)  | 0.001  |
| Impaired self-feeding                  | 31 (59.6) | 78 (22.6)   | 0.000  |
| Dependence in $\geq 5$ activities      | 36 (69.2) | 87(25.2)    | 0.0001 |

**Table 7** Variables included in the logistic regression model

| Variables          | B      | SE    | Wald    | Degrees<br>of<br>freedom | Sig.  | Exp(B) |
|--------------------|--------|-------|---------|--------------------------|-------|--------|
| Age <sup>1</sup>   | 1.381  | 0.349 | 15.664  | 1                        | 0.000 | 3.978  |
| DADLs <sup>2</sup> | 1.397  | 0.350 | 15.924  | 1                        | 0.000 | 4.042  |
| Drugs <sup>3</sup> | 1.515  | 0.443 | 11.715  | 1                        | 0.001 | 4.547  |
| Constant           | -3.234 | 0.295 | 120.122 | 1                        | 0.000 | 0.039  |

Hosmer and Lemeshow goodness of fit test p= 0.873

<sup>1</sup> Age: > 85 years old

<sup>2</sup> DADLs: Dependence in 5 or more activities of daily livings

<sup>3</sup> Drugs: total of 2 or more points for drugs taken on admission where antidepressants, antidementia drugs, and anticonvulsants score 1 point each, and antipsychotics score 2 points

Formatted: Font: (Default) Arial

**Table 8** Logistic regression model

| Group                     | Points on the prediction rule | Incidence of delirium (%) | OR                | AUC (IC 95%)     |
|---------------------------|-------------------------------|---------------------------|-------------------|------------------|
| Derivation cohort (n=397) |                               |                           |                   | 0.77 (0.73-0.82) |
|                           | 0                             | 9/219 (4)                 | Reference         |                  |
|                           | 1                             | 16/116 (14)               | 3.7 (1.5-8.7)     |                  |
|                           | ≥2                            | 27/62 (43)                | 18 (7.8-41.5)     |                  |
| Validation cohort (n=302) |                               |                           |                   | 0.85 (0.8-0.88)  |
|                           | 0                             | 5/142 (3.5)               | Reference         |                  |
|                           | 1                             | 18/77 (23)                | 8.3 (2.9-23.6)    |                  |
|                           | ≥2                            | 53/83 (64)                | 48.4 (17.8-131.4) |                  |

**Table 9** A 2 X 2 table for the validation cohort

| Cut-off point | Delirium | No delirium | Total |
|---------------|----------|-------------|-------|
| 0 (negative)  | 5        | 137         | 142   |
| ≥1 (positive) | 71       | 89          | 160   |
|               | 76       | 226         | 302   |

Sensitivity = 93.4%, 95% CI 85.5 to 97.2

Specificity = 60.6%, 95% CI 54.1 to 66.8

PPV = 44.4%, 95% CI 36.9 to 52.1

NPV = 96.5%, 95% CI 92 to 98.5

Figure 1: ROC curve for the derivation cohort

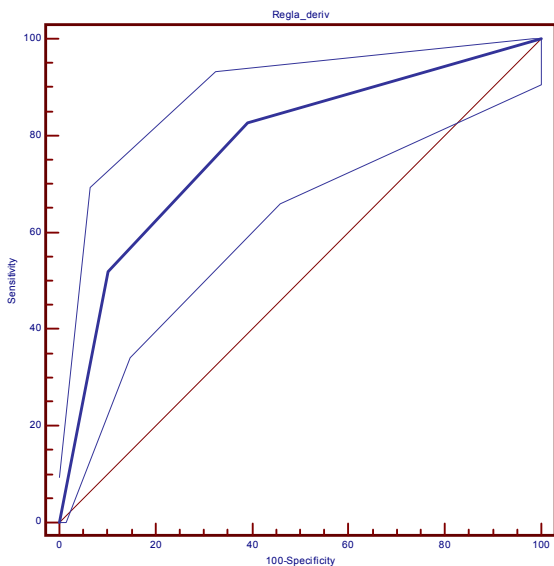

1  
2  
3  
4  
5  
6  
7  
8  
9  
10  
11  
12  
13  
14  
15  
16  
17  
18  
19  
20  
21  
22  
23  
24  
25  
26  
27  
28  
29  
30  
31  
32  
33  
34  
35  
36  
37  
38  
39  
40  
41  
42  
43  
44  
45  
46  
47  
48  
49  
50  
51  
52  
53  
54  
55  
56  
57  
58  
59  
60

Figure 2: ROC curve for the validation cohort

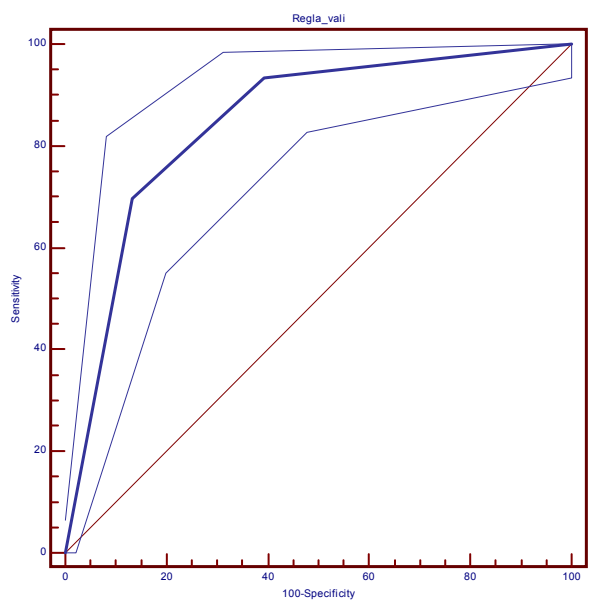

review only



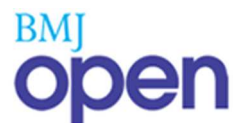

**DERIVATION AND VALIDATION OF A CLINICAL PREDICTION  
RULE FOR DELIRIUM IN PATIENTS ADMITTED TO A  
MEDICAL WARD: AN OBSERVATIONAL STUDY.**

|                                    |                                                                                                                                                                                                                                                   |
|------------------------------------|---------------------------------------------------------------------------------------------------------------------------------------------------------------------------------------------------------------------------------------------------|
| Journal:                           | <i>BMJ Open</i>                                                                                                                                                                                                                                   |
| Manuscript ID:                     | bmjopen-2012-001599.R2                                                                                                                                                                                                                            |
| Article Type:                      | Research                                                                                                                                                                                                                                          |
| Date Submitted by the Author:      | 03-Aug-2012                                                                                                                                                                                                                                       |
| Complete List of Authors:          | Urreta, Iratxe<br>Emparanza, Jose Ignacio; Osakidetza,<br>Martinez, Juan Antonio<br>Basabe, Iban; Osakidetza,<br>Belastegui, Ana; Osakidetza,<br>Aguirre, Cristina; Osakidetza,<br>Goikoetxea, Xabier; Osakidetza,<br>Liceaga, Nerea; osakidetza, |
| <b>Primary Subject<br>Heading</b>: | Medical management                                                                                                                                                                                                                                |
| Secondary Subject Heading:         | Neurology, Mental health                                                                                                                                                                                                                          |
| Keywords:                          | Delirium, clinical prediction rule, elderly                                                                                                                                                                                                       |
|                                    |                                                                                                                                                                                                                                                   |

SCHOLARONE™  
Manuscripts

Only

1  
2  
3 **DERIVATION AND VALIDATION OF A CLINICAL PREDICTION RULE FOR**  
4 **DELIRIUM IN PATIENTS ADMITTED TO A MEDICAL WARD: AN**  
5 **OBSERVATIONAL STUDY.**  
6  
7  
8  
9

10  
11  
12  
13 J Martinez RN<sup>1</sup>, A Belastegui RN<sup>1</sup>, I Basabe MD<sup>1</sup>, X Goicoechea MD<sup>1</sup>, C Agirre  
14 MD<sup>1</sup>, N Lizeaga RN<sup>1</sup>, I Urreta MD<sup>2</sup>, JI Emparanza PhD<sup>3</sup>.  
15  
16

17  
18 <sup>1</sup> Dept. of Internal Medicine, Donostia University Hospital, Spain  
19

20  
21 <sup>2</sup> Clinical Epidemiology Unit, Critical Appraisal Skills Programme – Spain  
22 (CASPe), Donostia University Hospital, Spain  
23

24  
25 <sup>3</sup> Clinical Epidemiology Unit, CIBER-ESP & CASPe, Donostia University  
26 Hospital, Spain  
27  
28  
29  
30

31  
32  
33  
34  
35 Corresponding author:  
36

37  
38 I Urreta  
39

40  
41 Email: iratxe.urretabarallobre@osakidetza.net  
42  
43  
44  
45  
46  
47  
48  
49  
50  
51  
52  
53  
54  
55  
56  
57  
58  
59  
60

## Copyright

The Corresponding Author has the right to grant on behalf of all authors and does grant on behalf of all authors, a worldwide licence to the Publishers and its licensees in perpetuity, in all forms, formats and media (whether known now or created in the future), to i) publish, reproduce, distribute, display and store the Contribution, ii) translate the Contribution into other languages, create adaptations, reprints, include within collections and create summaries, extracts and/or, abstracts of the Contribution, iii) create any other derivative work(s) based on the Contribution, iv) to exploit all subsidiary rights in the Contribution, v) the inclusion of electronic links from the Contribution to third party material where-ever it may be located; and, vi) license any third party to do any or all of the above.”

## ABSTRACT

**Objectives:** To develop and validate a simple clinical prediction rule, based on variables easily measurable at admission, to identify patients at high risk of developing delirium during their hospital stay on an internal medicine ward.

**Design:** Prospective study of two cohorts of patients admitted between May 1<sup>st</sup> and June 30<sup>th</sup> 2008 (derivation cohort), and between May 1<sup>st</sup> and June 30<sup>th</sup> 2009 (validation cohort).

**Setting:** A tertiary hospital in Donostia-Gipuzkoa (Spain)

**Participants:** 397 patients participated in the study. The mean age and incidence of delirium were 75.9 years and 13% respectively in the derivation cohort, and 75.8 years and 25% in the validation cohort.

**Main outcome measures:** The predictive variables analysed and finally included in the rule were: being aged 85 years old or older, being dependent in 5 or more activities of daily living, and taking 2 or more psychotropic drugs (antipsychotics, benzodiazepines, antidepressants, anticonvulsant, and/or antimentia drugs). The variable of interest was delirium as defined by the short Confusion Assessment Method, which assesses four characteristics: acute onset and fluctuating course, inattention, disorganised thinking, and altered level of consciousness.

**Results:** We developed a rule in which the individual risk of delirium is obtained by adding 1 point for each criterion met (age $\geq$ 85, high level of dependence, and being on psychotropic medication). The result is considered positive if the score is  $\geq$  1. The rule accuracy was: sensitivity = 93.4% (95% CI: 85.5-97.2),

1  
2  
3 specificity = 60.6% (95% CI: 54.1-66.8), PPV = 44.4% (95% CI: 36.9-52.1), and  
4  
5 NPV = 96.5% (95% CI: 92-98.5). The area under the ROC curve was 0.85 for  
6  
7 the validation cohort.  
8  
9

10 **Conclusions:** The presence or absence of any of the three predictive factors  
11 (age $\geq$ 85, high level of dependence, and psychotropic medication) allowed us to  
12 classify patients on internal medicine wards according to the risk of developing  
13 delirium. The simplicity of the variables in our clinical prediction rule means that  
14 the data collection required is feasible in busy medicine units.  
15  
16  
17  
18  
19  
20  
21  
22  
23  
24  
25  
26  
27  
28  
29  
30  
31  
32  
33  
34  
35  
36  
37  
38  
39  
40  
41  
42  
43  
44  
45  
46  
47  
48  
49  
50  
51  
52  
53  
54  
55  
56  
57  
58  
59  
60

## Introduction:

Delirium, also referred to as acute confusional state, is an acute disturbance of attention and cognition with a fluctuating course that often appears in hospitalised patients. Between 10% and 30% of patients admitted to general hospitals develop delirium,<sup>1-3</sup> with a prevalence of up to 60% among frail elderly patients.<sup>4</sup> It is a serious complication that increases mortality<sup>5</sup> and reduces the functional status of patients,<sup>6</sup> as well as increasing the length of hospital stays<sup>7-8</sup> and rates of readmission.<sup>9</sup> While the pathophysiology of delirium remains poorly understood, multiple risk factors have been identified.<sup>10</sup> These can be classified into two groups: factors that increase baseline vulnerability (presence of dementia, cerebrovascular accident, Parkinson's disease, old age, and sensory impairment, among others);<sup>11</sup> and those that may be a trigger (such as polypharmacy, infection, and dehydration).<sup>12-14</sup>

Various interventions to improve modifiable variables have been found effective in preventing the occurrence of delirium.<sup>15-18</sup> Therefore; the identification of patients at high risk of developing delirium is particularly important.<sup>19</sup>

Clinical prediction rules are useful tools for classifying patients at different levels of risk.<sup>20</sup> Other authors proposed a rule to predict the risk of developing delirium<sup>21</sup> for use in patients admitted due to clinical worsening of their condition, but its use has not become widespread in our setting since it requires variables that are difficult to measure on admission (Mini-Mental State Examination score, and visual acuity, among others).

1  
2  
3 The objective of this study was to derive and validate a simple clinical prediction  
4 rule, based on variables that are easily measurable and are often routinely  
5 taken on admission, to identify patients at high risk of developing delirium during  
6 their hospital stay on an internal medicine ward.  
7  
8  
9  
10

11  
12 The identification of these patients will allow us to introduce the necessary  
13 preventative measures.  
14  
15  
16  
17  
18  
19  
20  
21  
22  
23  
24  
25  
26  
27  
28  
29  
30  
31  
32  
33  
34  
35  
36  
37  
38  
39  
40  
41  
42  
43  
44  
45  
46  
47  
48  
49  
50  
51  
52  
53  
54  
55  
56  
57  
58  
59  
60

## Methods

### *Design*

To develop the clinical prediction rule we assessed a prospective cohort of consecutive patients admitted in four internal medicine wards. Subsequently, we assessed a different prospective cohort of consecutive patients to validate the rule.

### *Patients*

The derivation cohort was 397 consecutive patients aged 18 years or over, of both sexes, who were admitted to any of four internal medicine wards at Donostia Hospital between May 1<sup>st</sup> 2008 and June 30<sup>th</sup> 2008, and we used no other exclusion criteria. The following year, between May 1<sup>st</sup> 2009 and June 30<sup>th</sup> 2009, we recruited the validation cohort on the same basis: 302 consecutive patients aged 18 or over, of both sexes, who were admitted to any of the same four internal medicine wards at the hospital. The consent was obtained from the study participants and all patients gave their consent to participate in the study.

### *Assessment of delirium*

We defined delirium using the short version of the Confusion Assessment Method,<sup>22</sup> a short form for assessing confusion. This diagnostic algorithm assesses four characteristics: 1) acute onset and fluctuating course, 2)



1  
2  
3 inattention, 3) disorganised thinking, and 4) altered level of consciousness. The  
4  
5 diagnosis of delirium required the presence of 1) and 2), and either 3) or 4) (or  
6  
7 both). This assessment was performed by two independent researchers, when  
8  
9 it was considered that patients were ready for discharge, after analysis of any  
10  
11 relevant data in their medical record and nursing report. Disagreements were  
12  
13 resolved by consensus with a third researcher. All these evaluators were  
14  
15 blinded to the potential predictive variables selected for the study.  
16  
17  
18  
19  
20  
21

### 22 *Potential predictors*

23  
24  
25 The potential predictive variables for delirium were selected after a systematic  
26  
27 review of the literature<sup>10-14 23-25</sup>. We sought to identify variables that were easy  
28  
29 to measure and are often routinely recorded on admission to these wards.  
30  
31

32  
33 The following variables were selected and measured on admission: age (years),  
34  
35 sex, systolic blood pressure (mmHg), heart rate (beats/min), respiratory rate  
36  
37 (breaths/minute), axillary temperature (°C), oxygen therapy (no: not used; and  
38  
39 yes: oxygen with nasal cannula, mask, and/or oxygen at home), fluid therapy,  
40  
41 presence of urinary catheter, level of consciousness (normal: alert; or altered:  
42  
43 drowsiness, unresponsiveness to voice, unresponsiveness to pain, and/or  
44  
45 generally unresponsive), diagnosis of infection at admission (respiratory, urinary  
46  
47 or other types of infections; or no infection: any other cause of admission),  
48  
49 admission in the previous year, admission in the previous month, hearing  
50  
51 impairment (use of a hearing aid, or deafness reported by the patient or  
52  
53 caregiver), vision impairment (regular use of glasses or reduction in visual  
54  
55 acuity reported by the patient or caregiver), and dementia (in a medical report or  
56  
57  
58  
59  
60

1  
2  
3 reported by the caregiver). In addition, blood tests were taken on admission to  
4  
5 measure the following: haematocrit (%), levels of urea (mg/dl), creatinine  
6  
7 (mg/dl), sodium (mEq/l), potassium (mEq/l), and glucose (mg/dl), as well as  
8  
9 white blood cell ( $10^3/\mu\text{l}$ ) and neutrophil ( $10^3/\mu\text{l}$ ) counts. Lastly, certain  
10  
11 characteristics of patients prior to admission were also assessed: level of  
12  
13 dependence for activities of daily living (personal hygiene and grooming,  
14  
15 dressing and undressing, getting onto or off toilet, ambulation, bowel and  
16  
17 bladder control, and self-feeding) as dichotomous variables (dependent;  
18  
19 independent); presence of pressure ulcers, and excess alcohol intake ( $>60$   
20  
21 g/ethanol/day), as well as use of certain types of medication: benzodiazepines,  
22  
23 antidepressants, antidementia drugs, antipsychotics, anti-Parkinson's drugs, or  
24  
25 anticonvulsants.  
26  
27  
28  
29  
30  
31  
32

### 33 *Statistical analysis*

34  
35  
36 A descriptive analysis was carried out, based on the calculation of means and  
37  
38 standard deviations for continuous variables, and absolute or relative  
39  
40 frequencies as percentages for categorical variables. Subsequently, some  
41  
42 continuous variables were dichotomised using the median value.  
43  
44  
45

### 46 *Sample size*

47  
48  
49 Assuming a prevalence of delirium at admission of 10%, it was calculated that  
50  
51 we needed 10 patients with delirium for each variable included in the model,  
52  
53 with the intention that the model should be as parsimonious as possible.  
54  
55  
56  
57  
58  
59  
60

### *Comparison between derivation and validation cohorts*

We compared the characteristics of patients in the derivation cohort with those in the validation cohort using the Student's t-test for continuous variables and the Chi square test for ordinal and dichotomous variables.

### *Derivation of the prediction rule*

The characteristics of patients who developed delirium were compared with those of patients who did not, again using the Student's t-test or the Chi square test as appropriate. A p-value  $<0.25$  was taken to indicate potentially predictive variables and those meeting this criteria were included in the multivariate model. Then, using a stepwise logistic regression model we selected the terms (predictive variables) to be included in the final model. The criteria for entry in the model and for removal were  $p \leq 0.05$  and  $p \geq 0.10$  respectively. The Hosmer Lemeshow test was performed to assess the goodness of fit of this model.

We note that we also explored selecting variables for an alternative prediction rule by recursive partitioning. However, as the performance of this rule was poorer than that of the rule obtained by logistic regression, we decided to report exclusively the data concerning the rule derived using the latter method.

### *Validation cohort and model performance*

The clinical prediction rule was applied to the validation cohort. We report the incidence of delirium as a function of score on the rule and the ORs using the

1  
2  
3 lowest risk category as the reference. The performance of the rule in the two  
4  
5 cohorts was explored using ROC curve analysis.  
6  
7

8 To assess the predictive accuracy of the rule, we constructed a 2x2 table for  
9  
10 calculation of the following: sensitivity, specificity, and positive and negative  
11  
12 predictive values. The 95% confidence intervals of these indicators were also  
13  
14 calculated assuming a binomial distribution.  
15  
16

17  
18 We used SPSS 19.0 and MedCalc for all the analysis.  
19  
20  
21  
22  
23  
24  
25  
26  
27  
28  
29  
30  
31  
32  
33  
34  
35  
36  
37  
38  
39  
40  
41  
42  
43  
44  
45  
46  
47  
48  
49  
50  
51  
52  
53  
54  
55  
56  
57  
58  
59  
60

## Results

In the validation cohort, 13% of patients (52 out of 397) developed delirium, and in the derivation cohort the incidence was 25.2% (76 out 302). Table 1 summarises baseline characteristics of the derivation and validation cohorts. Patients included in our study were elderly ( $76.4 \pm 13.3$  years old) and slightly more than half were women (52%, 362 out of 699). The derivation and validation cohorts were similar in some respects, namely, age, sex, mean length of stay, and types of medication. On the other hand, patients in the validation cohort were significantly more dependant in certain activities of daily living: personal hygiene and grooming, dressing and undressing, and getting onto or off toilet.

Tables 2 to 6 report the results of the univariate analysis in which the risk factors were compared between patients who developed delirium and those who did not within the derivation cohort. Those who developed delirium were significantly older and had slightly higher respiratory rates, but there were no significant differences in blood test results.

Age was dichotomised using a cut-off of 85 years, a value that was found to have a sensitivity of 85% and a specificity of 56% for delirium by the ROC curve analysis. We found that the risk of delirium associated with the types of medication considered was similar for all except antipsychotic drugs, for which the risk was twice as high. Accordingly, the medication data was coded according to the number of different drugs patients were taking at admission with each antidepressant, antedementia, or anticonvulsant drug contributing equally, while antipsychotic drugs were weighted by a factor of two. The

1  
2  
3 activities of daily living data were also dichotomised with a cut-off of reported  
4  
5 impairments in five activities.  
6

7  
8 The scores for the clinical prediction rule were assigned on the basis of  
9  
10 regression coefficients obtained in the logistic regression model (Table 7). One  
11  
12 point was given to patients older than 85 years, to those who had 2 or more  
13  
14 points in the variable drugs, and to those with impairments in five or more of the  
15  
16 activities of daily living considered. Therefore, the total score for the rule ranged  
17  
18 between 0 and 3.  
19

20  
21  
22 The patients with delirium of the two cohorts scored similarly: 17% and 7%  
23  
24 scored 0, 48% and 30% scored  $\leq 1$  and 85% and 85% scored  $\leq 2$  in the  
25  
26 derivation and validation cohort respectively.  
27

28  
29  
30 Table 9 and Figures 1 and 2 describe the performance of the rule in the  
31  
32 derivation and validation cohorts. In both cohorts, we observed higher rates of  
33  
34 delirium associated with higher scores on the rule, the model having a good  
35  
36 predictive power for the validation cohort (area under the ROC curve, AUC =  
37  
38 0.85). In contrast with what would be expected, the values obtained in the  
39  
40 validation cohort are better than those obtained in the derivation cohort, and this  
41  
42 is probably related to the higher incidence of delirium in validation group.  
43  
44

45  
46 In particular, Table 9 lists the sensitivity (Se) and specificity (Sp), as well as the  
47  
48 positive and negative predictive values (PPVs and NPVs) obtained when the  
49  
50 rule was dichotomised as negative (a score of 0) or positive (as score of  $\geq 1$ ).  
51  
52 For the validation cohort, the Se, Sp, NPV, and PPV were 93.4%, 60.6%, 96%,  
53  
54 and 44% respectively  
55  
56  
57  
58  
59  
60

## DISCUSSION

In this prospective study, we identified three independent predictive factors for delirium: being 85 years old or older, being dependent in five or more activities of daily living (of the six considered), and taking psychotropic drugs (antipsychotics, benzodiazepines, antidepressants, anticonvulsants, and/or antimentia drugs). With these factors we developed a clinical prediction rule in which an individual risk score for delirium is obtained by adding 1 point for each of the factors present. Applying this rule, patients are classified as positive if they have a total score of 1 or more.

In the derivation cohort, 13% of patients developed delirium, while the incidence was somewhat higher, 25%, in the validation cohort. Patients were elderly (mean ages in the derivation and validation cohorts were 75.9 +/- 13.3 years and 76.8 +/- 13.3 years respectively), and there were slightly more women (52%). The mean length of hospital stay was 8 +/- 5.8 days and overall mortality was 5%. There is a significant difference in the ADL variables being those from the validation cohort more dependent than the derivation cohort. All the above mention variables explain the almost two fold discrepancy in the incidence of delirium between the two cohort.

There are multiple factors for the development of delirium, the predisposing and triggering factors being well defined. The predisposing factors are mostly related to degenerative brain disease (dementia, arteriosclerosis, Parkinson's disease, and depression).<sup>10 11</sup> On the other hand, there are a diverse range of triggering factors, in particular, medication, the presence of infection, surgery, metabolic disorders, and water-electrolyte imbalances, among others.<sup>13 14 23-25</sup>

1  
2  
3 In the present study, we have only explored variables that are readily available  
4 on admission, in order to use the predictive rule at that stage and be able to  
5 introduce preventative measures immediately in high-risk patients. These would  
6 include trying to avoid triggering factors for the development of delirium (such  
7 as changes of room/ward, unnecessary catheterisation, inadequate oral  
8 hydration, and polypharmacy).  
9

10  
11  
12 Interestingly, the factors found to be good predictors for the development of  
13 delirium in our study (age $\geq$ 85, high level of dependence, and being on  
14 psychotropic medication), to some extent, indirectly reflect the severity of the  
15 organic brain damage in patients with delirium.  
16

17  
18 Another predictive rule for delirium in this type of patients has been published<sup>21</sup>  
19 but showed a significantly lower performance than that we obtained (AUC =  
20 0.66 [0.55-0.77] vs. AUC=0.85 [0.80-0.90] with our rule). Further, in our opinion,  
21 it is also more difficult to apply than the rule we propose. The simplicity of the  
22 variables included in our rule makes data collection a feasible task for busy  
23 healthcare units.  
24  
25

26  
27  
28 Between 10% and 60% of patients admitted to hospital develop delirium,  
29 depending on the type of patient, the incidence in frail elderly patients being at  
30 the top of this range. In our study, it was 13% and 25% in the derivation and  
31 validations cohorts, respectively. Delirium is well known to be difficult to  
32 diagnose and a wide range of instruments have been developed to help detect  
33 the condition.<sup>26 27</sup> We used the Confusion Assessment Method<sup>22</sup> that has a  
34 sensitivity of 96% (95% CI 80-100%) and a specificity of 93% (95% CI 84-  
35 100%). In our study, the doctors in charge of the diagnosis of delirium were  
36  
37  
38  
39  
40  
41  
42  
43  
44  
45  
46  
47  
48  
49  
50  
51  
52  
53  
54  
55  
56  
57  
58  
59  
60



1  
2  
3 specialists in internal medicine, with considerable training and experience in the  
4 management of this type of patients, any differences being resolved by  
5 consensus with a third specialist. We note, however, that the diagnoses of  
6 delirium were not confirmed by a psychiatrist. This may partially explain the low  
7 incidence of delirium in our patients, that is, it may be that only the most  
8 clinically striking cases, those which required pharmacological treatment, were  
9 recognised.  
10  
11

12  
13  
14  
15  
16  
17  
18  
19 The association between delirium and an increase of morbidity and mortality<sup>5 6 9</sup>  
20 is well known, as are the effectiveness of preventive measures to avoid the  
21 development of the disease.<sup>15-18</sup> The use of the proposed predictive rule would  
22 allow us to classify around half of our inpatients (53%) as high-risk. Taking  
23 preventative measures in this high risk group, up to 93.4% of those who  
24 developed delirium in our study would have been covered by the measures and  
25 might not have then developed the condition.  
26  
27  
28  
29  
30  
31  
32  
33  
34

35  
36 It would be interesting for the clinical predictive rule we propose to be validated  
37 in other cohorts of frail elderly patients with worsening of multiple medical  
38 conditions to check its external validity.  
39  
40  
41  
42  
43  
44  
45  
46  
47  
48  
49  
50  
51  
52  
53  
54  
55  
56  
57  
58  
59  
60

1  
2  
3 **ACKNOWLEDGEMENTS:** We would like to thank all the medical and nursing  
4 staff of the Department of Internal Medicine at Donostia University Hospital for  
5 their contribution to the study.  
6  
7  
8  
9

10 **CONTRIBUTORS:** JM, AB, JIE and IU participated in the design of the study.  
11 JM, AB, IB, XG, CA and NL collected all data. JIE and IU carried out the  
12 statistical analysis. JM, IU and JIE drafted the manuscript. All authors approved  
13 the final version to be published. IU and JM are the guarantors.  
14  
15  
16  
17

18  
19  
20 **COMPETING INTERESTS:** All authors have completed the Unified Competing  
21 interests form at [http://www.icmje.org/coi\\_disclosure.pdf](http://www.icmje.org/coi_disclosure.pdf) (available on request  
22 from the corresponding author) and declare: no support from any organisation  
23 for the submitted work; no financial relationships with any organisations that  
24 might have an interest in the submitted work in the previous three years; and no  
25 other relationships or activities that could appear to have influenced the  
26 submitted work.  
27  
28  
29  
30  
31  
32  
33  
34

35 **ETHICAL APPROVAL:** The design was evaluated and then approved by the  
36 Clinical Research Ethics Committee of the Gipuzkoa Health region.  
37  
38  
39  
40

41 **DATA SHARING STATEMENT:** No additional data available  
42  
43  
44  
45  
46  
47  
48  
49  
50  
51  
52  
53  
54  
55  
56  
57  
58  
59  
60

**REFERENCES:**

- 1) Cole MG, Ciampi A, Belzile E, et al. Persistent delirium in older hospital patients: a systematic review of frequency and prognosis. *Age Ageing*. 2009; 38: 19-26
- 2) Trzepacz PT. Delirium. Advances in diagnosis, pathophysiology, and treatment. *Psychiatric Clinics of North America* 1996; 19 (3): 429-448.
- 3) Leentjens AF, van der Mast RC. Delirium in elderly people: an update. *Curr Opin Psychiatry*. 2005 May; 18 (3): 325-330.
- 4) Witlox J, Eurelings LS, de Jonghe JF, et al. Delirium in elderly patients and the risk of postdischarge mortality, institutionalization, and dementia: a meta-analysis. *JAMA*. 2010; 304: 443-451.
- 5) McCusker J, Cole M, Abrahamowicz M, et al. Delirium predicts 12-month mortality. *Archives of Internal Medicine* 2002; 162 (4): 457-463.
- 6) Moller JT, Cluitmans P, Rasmussen LS, et al. Long-term postoperative cognitive dysfunction in the elderly ISPOCD1 study. ISPOCD investigators. International Study of Post-Operative Cognitive Dysfunction. *Lancet* 1998; 351 (9106): 857-861.
- 7) McCusker J, Cole MG, Dendukuri N, et al. Does delirium increase hospital stay? *Journal of the American Geriatrics Society* 2003 51 (11):1539-1546.

1  
2  
3 8) Stevens LE, de Moore GM, Simpson JM. Delirium in hospital: does it  
4 increase length of stay? Australian & New Zealand Journal of Psychiatry 1998;  
5 32 (6): 805-808.  
6  
7

8  
9  
10  
11 9) Inouye SK, Rushing JT, Foreman MD, et al. Does delirium contribute to poor  
12 hospital outcomes? A three-site epidemiologic study. Journal of General  
13 Internal Medicine 1998; 13: 234-242.  
14  
15

16  
17  
18  
19  
20 10) Inouye SK. Delirium in hospitalized older patients: recognition and risk  
21 factors. Journal of Geriatric Psychiatry & Neurology 1998; 11 (3): 118-125;  
22 discussion 157-158.  
23  
24

25  
26  
27  
28 11) Fick DM; Agostini JV; Inouye SK. Delirium superimposed on dementia: a  
29 systematic review. J Am Geriatr Soc 2002; 50 (10):1723-1732.  
30  
31

32  
33 12) Inouye SK, Charpentier PA. Precipitating factors for delirium in hospitalized  
34 elderly persons. Predictive model and interrelationship with baseline  
35 vulnerability. JAMA. 1996; 275 (11): 852-857.  
36  
37

38  
39  
40 13) Laurila JV, Laakkonen ML, Tilvis RS, et al. Predisposing and precipitating  
41 factors for delirium in a frail geriatric population. J Psychosom Res. 2008 Sep;  
42 65 (3): 249-254.  
43  
44

45  
46  
47 14) Van Rompaey B, Schuurmans MJ, Shortridge-Baggett LM, et al. Risk  
48 factors for intensive care delirium: a systematic review. Intensive Crit Care  
49 Nurs. 2008 Apr; 24 (2):98-107.  
50  
51

52  
53  
54 15) Inouye, S, Bogardus, ST, Charpentier, PA, et al. A multicomponent  
55 intervention to prevent delirium in hospitalized older patients. N Engl J Med  
56 1999; 340: 669-676.  
57  
58

1  
2  
3  
4  
5 16) Milisen K, Lemiengre J, Braes T, et al. Multicomponent intervention  
6 strategies for managing delirium in hospitalized older people: systematic review.  
7  
8 Journal of Advanced Nursing 2005; 52 (1): 79-90  
9

10  
11  
12  
13 17) Vidan MT, Sanchez E, Alonso M, et al. An Intervention Integrated into Daily  
14 Clinical Practice Reduces the Incidence of Delirium During Hospitalization in  
15 Elderly Patients. J Am Geriatr Soc 2009; 57:2029–2036.  
16  
17

18  
19 18) Siddiqi N, Holt R, Britton AM, et al. Interventions for preventing delirium in  
20 hospitalised patients. *Cochrane Database of Systematic Reviews* 2007, Issue 2.  
21 Art. No.: CD005563. DOI: 10.1002/14651858.CD005563.pub2.  
22  
23

24  
25  
26 19) Leslie DL, Marcantonio ER, Zhang Y, et al. One-Year Health Care Costs  
27 Associated With Delirium in the Elderly Population. Arch Intern Med. 2008;168  
28 (1):27-32  
29  
30

31  
32  
33 20) Laupacis A, Sekar N, Stiell IG. Clinical prediction rules. A review and  
34 suggested modifications of methodological standards. JAMA. 1997 Feb 12; 277  
35 (6):488-494.  
36  
37

38  
39  
40  
41 21) Inouye SK, Viscoli CM, Horwitz RI, et al. A predictive model for delirium in  
42 hospitalized elderly medical patients based on admission characteristics. Ann  
43 Intern Med. 1993 Sep 15; 119 (6): 474-481.  
44  
45

46  
47  
48  
49  
50 22) Inouye SK, van Dyck CH, Alessi CA, et al. Clarifying confusion: the  
51 confusion assessment method. A new method for detection of delirium. Ann  
52 Intern Med. 1990 Dec 15;113 (12):941-948.  
53  
54

1  
2  
3 23) Elie M, Cole MG, Primeau FJ, et al. Delirium risk factors in elderly  
4 hospitalized patients. J Gen Intern Med. 1998 Mar; 13 (3):204-212.  
5  
6

7  
8 24) Pisani, MA, Murphy, TE, et al. Characteristics associated with delirium in  
9 older patients in a medical intensive care unit. Arch Intern Med 2007; 167:1629-  
10 1634.  
11  
12

13  
14 25) McCusker, J, Cole, M, Abrahamowicz, M, et al. Environmental risk factors  
15 for delirium in hospitalized older people. J Am Geriatr Soc 2001; 49:1327-1334.  
16  
17  
18

19  
20 26) Camilla L. Wong, MD, Jayna Holroyd-Leduc, et al. Does This Patient Have  
21 Delirium? Value of Bedside Instruments. JAMA. 2010; 304 (7): 779-786  
22  
23  
24

25  
26 27) Moraga AV, Rodriguez-Pascual C. Acurate diagnosis of delirium in elderly  
27 patients. Curr Opin Psychiatry. 2007 May; 20 (3):262-267.  
28  
29  
30  
31  
32  
33  
34  
35  
36  
37  
38  
39  
40  
41  
42  
43  
44  
45  
46  
47  
48  
49  
50  
51  
52  
53  
54  
55  
56  
57  
58  
59  
60

**Table 1** Characteristics of patients in the derivation and validation cohorts

| <b>Characteristics</b>                              | <b>Derivation cohort<br/>(n=397)</b> | <b>Validation cohort<br/>(n= 302)</b> | <b>p</b> |
|-----------------------------------------------------|--------------------------------------|---------------------------------------|----------|
| Mean age (SD)                                       | 75.9 (13.3)                          | 76.8 (13.3)                           | N.S      |
| Mean length of stay (SD)                            | 8.4 (5.8)                            | 8 (6.1)                               | N.S      |
| Women (%)                                           | 197 (49.6)                           | 165 (54.3)                            | N.S      |
| <b>Medication (%)</b>                               |                                      |                                       |          |
| Benzodiazepines                                     | 162 (40.8)                           | 134 (44.4)                            | N.S      |
| Antidepressants                                     | 75 (18.9)                            | 74 (24.5)                             | N.S      |
| Antidementia drugs                                  | 20 (5)                               | 11 (3.6)                              | N.S      |
| antipsychotics                                      | 24 (6)                               | 21 (7)                                | N.S      |
| Anti-Parkinson's agents                             | 13 (3.3)                             | 6(2)                                  | N.S      |
| Anticonvulsants                                     | 20 (5)                               | 16 (5.3)                              | N.S      |
| <b>Dependence in activities of daily living (%)</b> |                                      |                                       |          |
| Personal hygiene and grooming                       | 155 (39)                             | 171 (56.6)                            | <0.05    |
| Dressing and undressing                             | 155 (39)                             | 174 (57.6)                            | <0.05    |
| Getting onto or off toilet                          | 146 (36.8)                           | 161 (53.3)                            | <0.05    |
| Ambulation                                          | 163 (41.1)                           | 166 (55)                              | <0.05    |
| Bowel and bladder control                           | 139 (35)                             | 122 (40.4)                            | N.S      |
| Self-feeding                                        | 109 (27.5)                           | 102 (33.8)                            | N.S      |

**Table 2** Derivation cohort: univariate analysis of patient clinical variables considered potential risk factors for delirium at admission. Mean (SD)

| Variables                              | Delirium     | No delirium  | p     |
|----------------------------------------|--------------|--------------|-------|
| Age (years)                            | 83.83 (9.8)  | 74.75 (13.4) | 0.000 |
| Blood pressure (mmHg)                  | 127.5 (27.1) | 132.3 (26.5) | 0.22  |
| Respiratory rate (breaths/min)         | 27.92 (9.6)  | 24.42 (6.6)  | 0.001 |
| Heart rate (beats/min)                 | 86.6 (23.8)  | 84.06 (22.5) | N.S   |
| Body temperature (°C)                  | 36.7 (0.7)   | 36.7 (0.8)   | N.S   |
| Women (%)                              | 26 (50)      | 171 (49.6)   | NS    |
| Excess alcohol intake (%)              | 2 (3.8)      | 19 (5.5)     | NS    |
| Mean length of stay in hospital (days) | 9.3 (6.6)    | 8.3 (5.6)    | N.S   |
| Admission in previous year (%)         | 26 (50)      | 152 (44.1)   | NS    |
| Admission in previous month (%)        | 8(15.1)      | 45 (84.9)    | NS    |



**Table 3** Derivation cohort: univariate analysis of patient blood test results at admission. Mean (SD)

| Variables                            | Delirium     | No delirium  | p     |
|--------------------------------------|--------------|--------------|-------|
| Haematocrit (%)                      | 39.31 (7.6)  | 37.42 (6.5)  | 0.058 |
| Urea (mg/dl)                         | 62.3 (31.6)  | 60.3 (40.7)  | N.S   |
| Creatinine (mg/dl)                   | 1.14 (0.5)   | 1.25 (0.9)   | N.S   |
| Sodium (mEq/l)                       | 138.5 (5.6)  | 173.9 (5.5)  | N.S   |
| Potassium (mEq/l)                    | 5.2 (6.9)    | 4.8 (0.7)    | N.S   |
| Glucose (mg/dl)                      | 140.1 (66.3) | 140.8 (78.8) | N.S   |
| White blood cells<br>(10e3/ $\mu$ l) | 12.1 (12.2)  | 10.1(4.7)    | N.S   |
| Neutrophils<br>(10e3/ $\mu$ l)       | 9.8 (8.5)    | 10.8 (14.8)  | N.S   |

**Table 4** Derivation cohort: univariate analysis of patient medication prior to admission.

| Variables          | Delirium  | No delirium | p     |
|--------------------|-----------|-------------|-------|
| Antidepressants    | 16 (30.8) | 59 (17.1)   | 0.023 |
| Antidementia drugs | 5 (9.6)   | 15 (4.3)    | 0.16  |
| Antipsychotics     | 8 (15.4)  | 16 (4.6)    | 0.007 |
| Anticonvulsants    | 5 (9.6)   | 15 (4.3)    | 0.16  |
| Benzodiazepines    | 23 (44.2) | 139 (40.3)  | NS    |

**Table 5** Derivation cohort: variables characterising patient status on admission

| Variables              | Delirium  | No delirium | p     |
|------------------------|-----------|-------------|-------|
| Urinary catheter       | 13 (25)   | 37(10.7)    | NS    |
| Fluid therapy          | 29 (55.8) | 124 (35.9)  | 0.009 |
| Vision impairment      | 36 (69.2) | 192 (55.7)  | 0.072 |
| Hearing impairment     | 9 (17.3)  | 87 (25.2)   | NS    |
| Oxygen therapy         | 32 (61.5) | 202 (58.6)  | NS    |
| Pressure ulcers        | 3 (5.8)   | 25 (7.3)    | NS    |
| Level of consciousness | 5 (21.7)  | 18 (78.3)   | 0.20  |
| Dementia               | 18 (34.6) | 49 (14.2)   | 0.001 |
| Infection              | 28 (53.8) | 141(40.8)   | 0.097 |

**Table 6** Derivation cohort: univariate analysis of patient activities of daily living

| Variables                              | Delirium  | No delirium | p      |
|----------------------------------------|-----------|-------------|--------|
| Impaired personal hygiene and grooming | 39 (75)   | 116 (33.6)  | 0.0001 |
| Impaired dressing and undressing       | 38 (73.1) | 117 (33.9)  | 0.0001 |
| Impaired getting onto or off toilet    | 36 (69.2) | 110 (31.9)  | 0.001  |
| Impaired ambulation                    | 38 (73.1) | 125 (36.2)  | 0.001  |
| Impaired bowel and bladder control     | 36 (69.2) | 103 (29.9)  | 0.001  |
| Impaired self-feeding                  | 31 (59.6) | 78 (22.6)   | 0.000  |
| Dependence in $\geq 5$ activities      | 36 (69.2) | 87(25.2)    | 0.0001 |

**Table 7** Variables included in the logistic regression model

| Variables          | B      | SE    | Wald    | Degrees of freedom | Sig.  | Exp(B) |
|--------------------|--------|-------|---------|--------------------|-------|--------|
| Age <sup>1</sup>   | 1.381  | 0.349 | 15.664  | 1                  | 0.000 | 3.978  |
| DADLs <sup>2</sup> | 1.397  | 0.350 | 15.924  | 1                  | 0.000 | 4.042  |
| Drugs <sup>3</sup> | 1.515  | 0.443 | 11.715  | 1                  | 0.001 | 4.547  |
| Constant           | -3.234 | 0.295 | 120.122 | 1                  | 0.000 | 0.039  |

Hosmer and Lemeshow goodness of fit test p= 0.873

<sup>1</sup> Age: > 85 years old

<sup>2</sup> DADLs: Dependence in 5 or more activities of daily livings

<sup>3</sup> Drugs: total of 2 or more points for drugs taken on admission where antidepressants, antidementia drugs, and anticonvulsants score 1 point each, and antipsychotics score 2 points

**Table 8** Logistic regression model

| Group                     | Points on the prediction rule | Incidence of delirium (%) | OR                | AUC (IC 95%)     |
|---------------------------|-------------------------------|---------------------------|-------------------|------------------|
| Derivation cohort (n=397) |                               |                           |                   | 0.77 (0.73-0.82) |
|                           | 0                             | 9/219 (4)                 | Reference         |                  |
|                           | 1                             | 16/116 (14)               | 3.7 (1.5-8.7)     |                  |
|                           | ≥2                            | 27/62 (43)                | 18 (7.8-41.5)     |                  |
| Validation cohort (n=302) |                               |                           |                   | 0.85 (0.8-0.88)  |
|                           | 0                             | 5/142 (3.5)               | Reference         |                  |
|                           | 1                             | 18/77 (23)                | 8.3 (2.9-23.6)    |                  |
|                           | ≥2                            | 53/83 (64)                | 48.4 (17.8-131.4) |                  |

**Table 9** A 2 X 2 table for the validation cohort

| Cut-off point | Delirium | No delirium | Total |
|---------------|----------|-------------|-------|
| 0 (negative)  | 5        | 137         | 142   |
| ≥1 (positive) | 71       | 89          | 160   |
|               | 76       | 226         | 302   |

Sensitivity = 93.4%, 95% CI 85.5 to 97.2

Specificity = 60.6%, 95% CI 54.1 to 66.8

PPV = 44.4%, 95% CI 36.9 to 52.1

NPV = 96.5%, 95% CI 92 to 98.5

1  
2  
3 **DERIVATION AND VALIDATION OF A CLINICAL PREDICTION RULE FOR**  
4 **DELIRIUM IN PATIENTS ADMITTED TO A MEDICAL WARD: AN**  
5 **OBSERVATIONAL STUDY.**  
6  
7  
8  
9

10  
11  
12  
13 J Martinez RN<sup>1</sup>, A Belastegui RN<sup>1</sup>, I Basabe MD<sup>1</sup>, X Goicoechea MD<sup>1</sup>, C Agirre  
14 MD<sup>1</sup>, N Lizeaga RN<sup>1</sup>, I Urreta MD<sup>2</sup>, JI Emparanza PhD<sup>3</sup>.  
15  
16

17  
18 <sup>1</sup> Dept. of Internal Medicine, Donostia University Hospital, Spain  
19

20  
21 <sup>2</sup> Clinical Epidemiology Unit, Critical Appraisal Skills Programme – Spain  
22  
23 (CASPe), Donostia University Hospital, Spain  
24

25  
26 <sup>3</sup> Clinical Epidemiology Unit, CIBER-ESP & CASPe, Donostia University  
27  
28 Hospital, Spain  
29  
30

31  
32  
33  
34  
35 Corresponding author:  
36

37  
38 I Urreta  
39

40  
41 Email: iratxe.urretabarallobre@osakidetza.net  
42  
43  
44  
45  
46  
47  
48  
49  
50  
51  
52  
53  
54  
55  
56  
57  
58  
59  
60



## Copyright

The Corresponding Author has the right to grant on behalf of all authors and does grant on behalf of all authors, a worldwide licence to the Publishers and its licensees in perpetuity, in all forms, formats and media (whether known now or created in the future), to i) publish, reproduce, distribute, display and store the Contribution, ii) translate the Contribution into other languages, create adaptations, reprints, include within collections and create summaries, extracts and/or, abstracts of the Contribution, iii) create any other derivative work(s) based on the Contribution, iv) to exploit all subsidiary rights in the Contribution, v) the inclusion of electronic links from the Contribution to third party material where-ever it may be located; and, vi) license any third party to do any or all of the above.”

## ABSTRACT

**Objectives:** To develop and validate a simple clinical prediction rule, based on variables easily measurable at admission, to identify patients at high risk of developing delirium during their hospital stay on an internal medicine ward.

**Design:** Prospective study of two cohorts of patients admitted between May 1<sup>st</sup> and June 30<sup>th</sup> 2008 (derivation cohort), and between May 1<sup>st</sup> and June 30<sup>th</sup> 2009 (validation cohort).

**Setting:** A tertiary hospital in Donostia-Gipuzkoa (Spain)

**Participants:** 397 patients participated in the study. The mean age and ~~incidence~~ prevalence of delirium were 75.9 years and 13% respectively in the derivation cohort, and 75.8 years and 25% in the validation cohort.

**Main outcome measures:** The predictive variables analysed and finally included in the rule were: being aged 85 years old or older, being dependent in 5 or more activities of daily living, and taking 2 or more psychotropic drugs (antipsychotics, benzodiazepines, antidepressants, anticonvulsant, and/or antimentia drugs). The variable of interest was delirium as defined by the short Confusion Assessment Method, which assesses four characteristics: acute onset and fluctuating course, inattention, disorganised thinking, and altered level of consciousness.

**Results:** We developed a rule in which the individual risk of delirium is obtained by adding 1 point for each criterion met (age $\geq$ 85, high level of dependence, and being on psychotropic medication). The result is considered positive if the score is  $\geq$  1. The rule accuracy was: sensitivity = 93.4% (95% CI: 85.5-97.2),

1  
2  
3 specificity = 60.6% (95% CI: 54.1-66.8), PPV = 44.4% (95% CI: 36.9-52.1), and  
4  
5 NPV = 96.5% (95% CI: 92-98.5). The area under the ROC curve was 0.85 for  
6  
7 the validation cohort.  
8  
9

10 **Conclusions:** The presence or absence of any of the three predictive factors  
11 (age $\geq$ 85, high level of dependence, and psychotropic medication) allowed us to  
12 classify patients on internal medicine wards according to the risk of developing  
13 delirium. The simplicity of the variables in our clinical prediction rule means that  
14 the data collection required is feasible in busy medicine units.  
15  
16  
17  
18  
19  
20  
21  
22  
23  
24  
25  
26  
27  
28  
29  
30  
31  
32  
33  
34  
35  
36  
37  
38  
39  
40  
41  
42  
43  
44  
45  
46  
47  
48  
49  
50  
51  
52  
53  
54  
55  
56  
57  
58  
59  
60

## Introduction:

Delirium, also referred to as acute confusional state, is an acute disturbance of attention and cognition with a fluctuating course that often appears in hospitalised patients. Between 10% and 30% of patients admitted to general hospitals develop delirium,<sup>1-3</sup> with a prevalence of up to 60% among frail elderly patients.<sup>4</sup> It is a serious complication that increases mortality<sup>5</sup> and reduces the functional status of patients,<sup>6</sup> as well as increasing the length of hospital stays<sup>7-8</sup> and rates of readmission.<sup>9</sup> While the pathophysiology of delirium remains poorly understood, multiple risk factors have been identified.<sup>10</sup> These can be classified into two groups: factors that increase baseline vulnerability (presence of dementia, cerebrovascular accident, Parkinson's disease, old age, and sensory impairment, among others);<sup>11</sup> and those that may be a trigger (such as polypharmacy, infection, and dehydration).<sup>12-14</sup>

Various interventions to improve modifiable variables have been found effective in preventing the occurrence of delirium.<sup>15-18</sup> Therefore; the identification of patients at high risk of developing delirium is particularly important.<sup>19</sup>

Clinical prediction rules are useful tools for classifying patients at different levels of risk.<sup>20</sup> Other authors proposed a rule to predict the risk of developing delirium<sup>21</sup> for use in patients admitted due to clinical worsening of their condition, but its use has not become widespread in our setting since it requires variables that are difficult to measure on admission (Mini-Mental State Examination score, and visual acuity, among others).

1  
2  
3 The objective of this study was to derive and validate a simple clinical prediction  
4 rule, based on variables that are easily measurable and are often routinely  
5 taken on admission, to identify patients at high risk of developing delirium during  
6 their hospital stay on an internal medicine ward.  
7  
8  
9  
10

11  
12 The identification of these patients will allow us to introduce the necessary  
13 preventative measures.  
14  
15  
16  
17  
18  
19  
20  
21  
22  
23  
24  
25  
26  
27  
28  
29  
30  
31  
32  
33  
34  
35  
36  
37  
38  
39  
40  
41  
42  
43  
44  
45  
46  
47  
48  
49  
50  
51  
52  
53  
54  
55  
56  
57  
58  
59  
60

## Methods

### *Design*

To develop the clinical prediction rule we assessed a prospective cohort of consecutive patients admitted in four internal medicine wards. Subsequently, we assessed a different prospective cohort of consecutive patients to validate the rule.

### *Patients*

The derivation cohort was 397 consecutive patients aged 18 years or over, of both sexes, who were admitted to any of four internal medicine wards at Donostia Hospital between May 1<sup>st</sup> 2008 and June 30<sup>th</sup> 2008, and we used no other exclusion criteria. The following year, between May 1<sup>st</sup> 2009 and June 30<sup>th</sup> 2009, we recruited the validation cohort on the same basis: 302 consecutive patients aged 18 or over, of both sexes, who were admitted to any of the same four internal medicine wards at the hospital. The consent was obtained from the study participants and all patients gave their consent to participate in the study.

### *Assessment of delirium*

We defined delirium using the short version of the Confusion Assessment Method,<sup>22</sup> a short form for assessing confusion. This diagnostic algorithm assesses four characteristics: 1) acute onset and fluctuating course, 2)

1  
2  
3 inattention, 3) disorganised thinking, and 4) altered level of consciousness. The  
4  
5 diagnosis of delirium required the presence of 1) and 2), and either 3) or 4) (or  
6  
7 both). This assessment was performed by two independent researchers, when  
8  
9 it was considered that patients were ready for discharge, after analysis of any  
10  
11 relevant data in their medical record and nursing report. Disagreements were  
12  
13 resolved by consensus with a third researcher. All these evaluators were  
14  
15 blinded to the potential predictive variables selected for the study.  
16  
17  
18  
19  
20  
21

### 22 *Potential predictors*

23  
24  
25 The potential predictive variables for delirium were selected after a systematic  
26  
27 review of the literature<sup>10-14 23-25</sup>. We sought to identify variables that were easy  
28  
29 to measure and are often routinely recorded on admission to these wards.  
30  
31

32  
33 The following variables were selected and measured on admission: age (years),  
34  
35 sex, systolic blood pressure (mmHg), heart rate (beats/min), respiratory rate  
36  
37 (breaths/minute), axillary temperature (°C), oxygen therapy (no: not used; and  
38  
39 yes: oxygen with nasal cannula, mask, and/or oxygen at home), fluid therapy,  
40  
41 presence of urinary catheter, level of consciousness (normal: alert; or altered:  
42  
43 drowsiness, unresponsiveness to voice, unresponsiveness to pain, and/or  
44  
45 generally unresponsive), diagnosis of infection at admission (respiratory, urinary  
46  
47 or other types of infections; or no infection: any other cause of admission),  
48  
49 admission in the previous year, admission in the previous month, hearing  
50  
51 impairment (use of a hearing aid, or deafness reported by the patient or  
52  
53 caregiver), vision impairment (regular use of glasses or reduction in visual  
54  
55 acuity reported by the patient or caregiver), and dementia (in a medical report or  
56  
57  
58  
59  
60

1  
2  
3 reported by the caregiver). In addition, blood tests were taken on admission to  
4  
5 measure the following: haematocrit (%), levels of urea (mg/dl), creatinine  
6  
7 (mg/dl), sodium (mEq/l), potassium (mEq/l), and glucose (mg/dl), as well as  
8  
9 white blood cell ( $10^3/\mu\text{l}$ ) and neutrophil ( $10^3/\mu\text{l}$ ) counts. Lastly, certain  
10  
11 characteristics of patients prior to admission were also assessed: level of  
12  
13 dependence for activities of daily living (personal hygiene and grooming,  
14  
15 dressing and undressing, getting onto or off toilet, ambulation, bowel and  
16  
17 bladder control, and self-feeding) as dichotomous variables (dependent;  
18  
19 independent); presence of pressure ulcers, and excess alcohol intake ( $>60$   
20  
21 g/ethanol/day), as well as use of certain types of medication: benzodiazepines,  
22  
23 antidepressants, antidementia drugs, antipsychotics, anti-Parkinson's drugs, or  
24  
25 anticonvulsants.  
26  
27  
28  
29  
30  
31  
32

### 33 *Statistical analysis*

34  
35  
36 A descriptive analysis was carried out, based on the calculation of means and  
37  
38 standard deviations for continuous variables, and absolute or relative  
39  
40 frequencies as percentages for categorical variables. Subsequently, some  
41  
42 continuous variables were dichotomised using the median value.  
43  
44  
45

### 46 *Sample size*

47  
48  
49 Assuming a prevalence of delirium at admission of 10%, it was calculated that  
50  
51 we needed 10 patients with delirium for each variable included in the model,  
52  
53 with the intention that the model should be as parsimonious as possible.  
54  
55  
56  
57  
58  
59  
60



### *Comparison between derivation and validation cohorts*

We compared the characteristics of patients in the derivation cohort with those in the validation cohort using the Student's t-test for continuous variables and the Chi square test for ordinal and dichotomous variables.

### *Derivation of the prediction rule*

The characteristics of patients who developed delirium were compared with those of patients who did not, again using the Student's t-test or the Chi square test as appropriate. A p-value  $<0.25$  was taken to indicate potentially predictive variables and those meeting this criteria were included in the multivariate model. Then, using a stepwise logistic regression model we selected the terms (predictive variables) to be included in the final model. The criteria for entry in the model and for removal were  $p \leq 0.05$  and  $p \geq 0.10$  respectively. The Hosmer Lemeshow test was performed to assess the goodness of fit of this model.

We note that we also explored selecting variables for an alternative prediction rule by recursive partitioning. However, as the performance of this rule was poorer than that of the rule obtained by logistic regression, we decided to report exclusively the data concerning the rule derived using the latter method.

### *Validation cohort and model performance*

The clinical prediction rule was applied to the validation cohort. We report the incidence of delirium as a function of score on the rule and the ORs using the

1  
2  
3 lowest risk category as the reference. The performance of the rule in the two  
4  
5 cohorts was explored using ROC curve analysis.  
6  
7

8 To assess the predictive diagnostic accuracy of the rule, we constructed a 2x2  
9  
10 table for calculation of the following: sensitivity, specificity, and positive and  
11  
12 negative predictive values. The 95% confidence intervals of these indicators  
13  
14 were also calculated assuming a binomial distribution.  
15  
16

17  
18 We used SPSS 19.0 and MedCalc for all the analysis.  
19  
20  
21  
22  
23  
24  
25  
26  
27  
28  
29  
30  
31  
32  
33  
34  
35  
36  
37  
38  
39  
40  
41  
42  
43  
44  
45  
46  
47  
48  
49  
50  
51  
52  
53  
54  
55  
56  
57  
58  
59  
60

## Results

In the validation cohort, 13% of patients (52 out of 397) developed delirium, and in the derivation cohort the ~~incidence~~ prevalence was 25.2% (76 out of 302). Table 1 summarises baseline characteristics of the derivation and validation cohorts. Patients included in our study were elderly (76.4±13.3 years old) and slightly more than half were women (52%, 362 out of 699). The derivation and validation cohorts were similar in some respects, namely, age, sex, mean length of stay, and types of medication. On the other hand, patients in the validation cohort were significantly more dependant in certain activities of daily living: personal hygiene and grooming, dressing and undressing, and getting onto or off toilet.

Tables 2 to 6 report the results of the univariate analysis in which the risk factors were compared between patients who developed delirium and those who did not within the derivation cohort. Those who developed delirium were significantly older and had slightly higher respiratory rates, but there were no significant differences in blood test results.

Age was dichotomised using a cut-off of 85 years, a value that was found to have a sensitivity of 85% and a specificity of 56% for delirium by the ROC curve analysis. We found that the risk of delirium associated with the types of medication considered was similar for all except antipsychotic drugs, for which the risk was twice as high. Accordingly, the medication data was coded according to the number of different drugs patients were taking at admission with each antidepressant, antimentia, or anticonvulsant drug contributing equally, while antipsychotic drugs were weighted by a factor of two. The

1  
2  
3 activities of daily living data were also dichotomised with a cut-off of reported  
4  
5 impairments in five activities.  
6

7  
8 The scores for the clinical prediction rule were assigned on the basis of  
9  
10 regression coefficients obtained in the logistic regression model (Table 7). One  
11  
12 point was given to patients older than 85 years, to those who had 2 or more  
13  
14 points in the variable drugs, and to those with impairments in five or more of the  
15  
16 activities of daily living considered. Therefore, the total score for the rule ranged  
17  
18 between 0 and 3.  
19

20  
21 The patients with delirium of the two cohorts scored similarly: 17% and 7%  
22  
23 scored 0, 48% and 30% scored  $\leq 1$  and 85% and 85% scored  $\leq 2$  in the  
24  
25 derivation and validation cohort respectively.  
26  
27

28  
29 Table 9 and Figures 1 and 2 describe the performance of the rule in the  
30  
31 derivation and validation cohorts. In both cohorts, we observed higher rates of  
32  
33 delirium associated with higher scores on the rule, the model having a good  
34  
35 predictive power for the validation cohort (area under the ROC curve, AUC =  
36  
37 0.85). In contrast with what would be expected, the values obtained in the  
38  
39 validation cohort are better than those obtained in the derivation cohort, and this  
40  
41  
42  
43 is probably related to the higher incidence of delirium in validation group.  
44

45  
46 In particular, Table 9 lists the sensitivity (Se) and specificity (Sp), as well as the  
47  
48 positive and negative predictive values (PPVs and NPVs) obtained when the  
49  
50 rule was dichotomised as negative (a score of 0) or positive (as score of  $\geq 1$ ).  
51  
52 For the validation cohort, the Se, Sp, NPV, and PPV were 93.4%, 60.6%, 96%,  
53  
54 and 44% respectively  
55  
56  
57  
58  
59  
60

## DISCUSSION

In this prospective study, we identified three independent predictive factors for delirium: being 85 years old or older, being dependent in five or more activities of daily living (of the six considered), and taking psychotropic drugs (antipsychotics, benzodiazepines, antidepressants, anticonvulsants, and/or antimentia drugs). With these factors we developed a clinical prediction rule in which an individual risk score for delirium is obtained by adding 1 point for each of the factors present. Applying this rule, patients are classified as positive if they have a total score of 1 or more.

In the derivation cohort, 13% of patients developed delirium, while the ~~incidence~~ prevalence was somewhat higher, 25%, in the validation cohort. Patients were elderly (mean ages in the derivation and validation cohorts were 75.9 +/- 13.3 years and 76.8 +/- 13.3 years respectively), and there were slightly more women (52%). The mean length of hospital stay was 8 +/- 5.8 days and overall mortality was 5%. There is a significant difference in the ADL variables being those from the validation cohort more dependent than the derivation cohort. All the above mentioned variables explain the almost two fold discrepancy in the incidence of delirium between the two cohorts.

There are multiple factors for the development of delirium, the predisposing and triggering factors being well defined. The predisposing factors are mostly related to degenerative brain disease (dementia, arteriosclerosis, Parkinson's disease, and depression).<sup>10 11</sup> On the other hand, there are a diverse range of triggering factors, in particular, medication, the presence of infection, surgery, metabolic disorders, and water-electrolyte imbalances, among others.<sup>13 14 23-25</sup>

1  
2  
3 In the present study, we have only explored variables that are readily available  
4 on admission, in order to use the predictive rule at that stage and be able to  
5 introduce preventative measures immediately in high-risk patients. These would  
6 include trying to avoid triggering factors for the development of delirium (such  
7 as changes of room/ward, unnecessary catheterisation, inadequate oral  
8 hydration, and polypharmacy).

9  
10  
11  
12  
13  
14  
15  
16  
17 Interestingly, the factors found to be good predictors for the development of  
18 delirium in our study (age $\geq$ 85, high level of dependence, and being on  
19 psychotropic medication), to some extent, indirectly reflect the severity of the  
20 organic brain damage in patients with delirium.

21  
22  
23  
24  
25  
26  
27 Another predictive rule for delirium in this type of patients has been published<sup>21</sup>  
28 but showed a significantly lower performance than that we obtained (AUC =  
29 0.66 [0.55-0.77] vs. AUC=0.85 [0.80-0.90] with our rule). Further, in our opinion,  
30 it is also more difficult to apply than the rule we propose. The simplicity of the  
31 variables included in our rule makes data collection a feasible task for busy  
32 healthcare units.

33  
34  
35  
36  
37  
38  
39  
40  
41 Between 10% and 60% of patients admitted to hospital develop delirium,  
42 depending on the type of patient, the ~~incidence~~ prevalence in frail elderly patients  
43 being at the top of this range. In our study, it was 13% and 25% in the derivation  
44 and validations cohorts, respectively. Delirium is well known to be difficult to  
45 diagnose and a wide range of instruments have been developed to help detect  
46 the condition.<sup>26 27</sup> We used the Confusion Assessment Method<sup>22</sup> that has a  
47 sensitivity of 96% (95% CI 80-100%) and a specificity of 93% (95% CI 84-  
48 100%). In our study, the doctors in charge of the diagnosis of delirium were  
49  
50  
51  
52  
53  
54  
55  
56  
57  
58  
59  
60

1  
2  
3 specialists in internal medicine, with considerable training and experience in the  
4 management of this type of patients, any differences being resolved by  
5 consensus with a third specialist. We note, however, that the diagnoses of  
6 delirium were not confirmed by a psychiatrist. This may partially explain the low  
7  
8  
9  
10  
11 ~~incidence~~ prevalence of delirium in our patients, that is, it may be that only the most  
12 clinically striking cases, those which required pharmacological treatment, were  
13 recognised.  
14  
15  
16  
17  
18

19 The association between delirium and an increase of morbidity and mortality<sup>5 6 9</sup>  
20 is well known, as are the effectiveness of preventive measures to avoid the  
21 development of the disease.<sup>15-18</sup> The use of the proposed predictive rule would  
22 allow us to classify around half of our inpatients (53%) as high-risk. Taking  
23 preventative measures in this high risk group, up to 93.4% of those who  
24 developed delirium in our study would have been covered by the measures and  
25 might not have then developed the condition.  
26  
27  
28  
29  
30  
31  
32  
33  
34

35 It would be interesting for the clinical predictive rule we propose to be validated  
36 in other cohorts of frail elderly patients with worsening of multiple medical  
37 conditions to check its external validity.  
38  
39  
40  
41  
42  
43  
44  
45  
46  
47  
48  
49  
50  
51  
52  
53  
54  
55  
56  
57  
58  
59  
60

1  
2  
3 **ACKNOWLEDGEMENTS:** We would like to thank all the medical and nursing  
4 staff of the Department of Internal Medicine at Donostia University Hospital for  
5 their contribution to the study.  
6  
7  
8

9  
10 **CONTRIBUTORS:** JM, AB, JIE and IU participated in the design of the study.  
11 JM, AB, IB, XG, CA and NL collected all data. JIE and IU carried out the  
12 statistical analysis. JM, IU and JIE drafted the manuscript. All authors approved  
13 the final version to be published. IU and JM are the guarantors.  
14  
15  
16  
17

18  
19  
20 **COMPETING INTERESTS:** All authors have completed the Unified Competing  
21 interests form at [http://www.icmje.org/coi\\_disclosure.pdf](http://www.icmje.org/coi_disclosure.pdf) (available on request  
22 from the corresponding author) and declare: no support from any organisation  
23 for the submitted work; no financial relationships with any organisations that  
24 might have an interest in the submitted work in the previous three years; and no  
25 other relationships or activities that could appear to have influenced the  
26 submitted work.  
27  
28  
29  
30  
31  
32  
33  
34

35 **ETHICAL APPROVAL:** The design was evaluated and then approved by the  
36 Clinical Research Ethics Committee of the Gipuzkoa Health region.  
37  
38  
39  
40  
41  
42  
43  
44  
45  
46  
47  
48  
49  
50  
51  
52  
53  
54  
55  
56  
57  
58  
59  
60



**REFERENCES:**

1) Cole MG, Ciampi A, Belzile E, Zhong L. Persistent delirium in older hospital patients: a systematic review of frequency and prognosis. *Age Ageing*. 2009; 38: 19-26

2) Trzepacz PT. Delirium. Advances in diagnosis, pathophysiology, and treatment. *Psychiatric Clinics of North America* 1996; 19 (3): 429-448.

3) Leentjens AF, van der Mast RC. Delirium in elderly people: an update. *Curr Opin Psychiatry*. 2005 May; 18 (3): 325-330.

4) Witlox J, Eurelings LS, de Jonghe JF, Kalisvaart KJ, Eikelenboom P, van Gool WA. Delirium in elderly patients and the risk of postdischarge mortality, institutionalization, and dementia: a meta-analysis. *JAMA*. 2010; 304: 443-451.

5) McCusker J, Cole M, Abrahamowicz M, Primeau F, Belzile E. Delirium predicts 12-month mortality. *Archives of Internal Medicine* 2002; 162 (4): 457-463.

6) Moller JT, Cluitmans P, Rasmussen LS, Houx P, Rasmussen H, Canet J, et al. Long-term postoperative cognitive dysfunction in the elderly ISPOCD1 study. ISPOCD investigators. International Study of Post-Operative Cognitive Dysfunction. *Lancet* 1998; 351 (9106): 857-861.

7) McCusker J, Cole MG, Dendukuri N, Belzile E. Does delirium increase hospital stay? *Journal of the American Geriatrics Society* 2003 51 (11):1539-1546.

1  
2  
3  
4  
5  
6 8) Stevens LE, de Moore GM, Simpson JM. Delirium in hospital: does it  
7 increase length of stay? Australian & New Zealand Journal of Psychiatry 1998;  
8 32 (6): 805-808.  
9

10  
11  
12  
13  
14 9) Inouye SK, Rushing JT, Foreman MD, Palmer RM, Pompei P. Does delirium  
15 contribute to poor hospital outcomes? A three-site epidemiologic study. Journal  
16 of General Internal Medicine 1998; 13: 234-242.  
17  
18

19  
20  
21  
22  
23 10) Inouye SK. Delirium in hospitalized older patients: recognition and risk  
24 factors. Journal of Geriatric Psychiatry & Neurology 1998; 11 (3): 118-125;  
25 discussion 157-158.  
26  
27

28  
29  
30 11) Fick DM; Agostini JV; Inouye SK. Delirium superimposed on dementia: a  
31 systematic review. J Am Geriatr Soc 2002; 50 (10):1723-1732.  
32  
33

34  
35 12) Inouye SK, Charpentier PA. Precipitating factors for delirium in hospitalized  
36 elderly persons. Predictive model and interrelationship with baseline  
37 vulnerability. JAMA. 1996; 275 (11): 852-857.  
38  
39

40  
41  
42 13) Laurila JV, Laakkonen ML, Tilvis RS, Pitkala KH. Predisposing and  
43 precipitating factors for delirium in a frail geriatric population. J Psychosom  
44 Res. 2008 Sep; 65 (3): 249-254.  
45  
46  
47

48  
49  
50 14) Van Rompaey B, Schuurmans MJ, Shortridge-Baggett LM, Truijen S,  
51 Bossaert L. Risk factors for intensive care delirium: a systematic review.  
52 Intensive Crit Care Nurs. 2008 Apr; 24 (2):98-107.  
53  
54  
55

- 1  
2  
3 15) Inouye, S, Bogardus, ST, Charpentier, PA, et al. A multicomponent  
4 intervention to prevent delirium in hospitalized older patients. *N Engl J Med*  
5 1999; 340: 669-676.  
6  
7  
8  
9  
10 16) Milisen K, Lemiengre J, Braes T, Foreman M D. Multicomponent  
11 intervention strategies for managing delirium in hospitalized older people:  
12 systematic review. *Journal of Advanced Nursing* 2005; 52 (1): 79-90  
13  
14  
15  
16  
17  
18 17) Vidan MT, Sanchez E, Alonso M, Montero B, Ortiz J, Serra JA. An  
19 Intervention Integrated into Daily Clinical Practice Reduces the Incidence of  
20 Delirium During Hospitalization in Elderly Patients. *J Am Geriatr Soc* 2009;  
21 57:2029–2036.  
22  
23  
24  
25  
26 18) Siddiqi N, Holt R, Britton AM, Holmes J. Interventions for preventing  
27 delirium in hospitalised patients. *Cochrane Database of Systematic Reviews*  
28 2007, Issue 2. Art. No.: CD005563. DOI: 10.1002/14651858.CD005563.pub2.  
29  
30  
31  
32  
33 19) Leslie DL, Marcantonio ER, Zhang Y, Summer LLs, Intuye SK. One-Year  
34 Health Care Costs Associated With Delirium in the Elderly Population. *Arch*  
35 *Intern Med.* 2008;168 (1):27-32  
36  
37  
38  
39 20) Laupacis A, Sekar N, Stiell IG. Clinical prediction rules. A review and  
40 suggested modifications of methodological standards. *JAMA.* 1997 Feb 12; 277  
41 (6):488-494.  
42  
43  
44  
45  
46  
47  
48 21) Inouye SK, Viscoli CM, Horwitz RI, Hurst LD, Tinetti ME. A predictive model  
49 for delirium in hospitalized elderly medical patients based on admission  
50 characteristics. *Ann Intern Med.* 1993 Sep 15; 119 (6): 474-481.  
51  
52  
53  
54  
55  
56  
57  
58  
59  
60

1  
2  
3 22) Inouye SK, van Dyck CH, Alessi CA, Balkin S, Siegal AP, Horwitz RI.  
4 Clarifying confusion: the confusion assessment method. A new method for  
5 detection of delirium. *Ann Intern Med.* 1990 Dec 15;113 (12):941-948.  
6  
7  
8

9  
10  
11 23) Elie M, Cole MG, Primeau FJ, Bellavance F. Delirium risk factors in elderly  
12 hospitalized patients. *J Gen Intern Med.* 1998 Mar; 13 (3):204-212.  
13  
14

15  
16 24) Pisani, MA, Murphy, TE, Van Ness, PH, et al. Characteristics associated  
17 with delirium in older patients in a medical intensive care unit. *Arch Intern Med*  
18 2007; 167:1629-1634.  
19  
20  
21

22  
23 25) McCusker, J, Cole, M, Abrahamowicz, M, et al. Environmental risk factors  
24 for delirium in hospitalized older people. *J Am Geriatr Soc* 2001; 49:1327-1334.  
25  
26

27  
28 26) Camilla L. Wong, MD, Jayna Holroyd-Leduc, MD, FRCPC, David L. Simel,  
29 MD, MHS, Sharon E. Straus, MD, MSc, FRCPC. Does This Patient Have  
30 Delirium? Value of Bedside Instruments. *JAMA.* 2010; 304 (7): 779-786  
31  
32  
33  
34

35  
36 27) Moraga AV, Rodriguez-Pascual C. Accurate diagnosis of delirium in elderly  
37 patients. *Curr Opin Psychiatry.* 2007 May; 20 (3):262-267.  
38  
39  
40  
41  
42  
43  
44  
45  
46  
47  
48  
49  
50  
51  
52  
53  
54  
55  
56  
57  
58  
59  
60

**Table 1** Characteristics of patients in the derivation and validation cohorts

| <b>Characteristics</b>                              | <b>Derivation cohort<br/>(n=397)</b> | <b>Validation cohort<br/>(n= 302)</b> | <b>p</b> |
|-----------------------------------------------------|--------------------------------------|---------------------------------------|----------|
| Mean age (SD)                                       | 75.9 (13.3)                          | 76.8 (13.3)                           | N.S      |
| Mean length of stay (SD)                            | 8.4 (5.8)                            | 8 (6.1)                               | N.S      |
| Women (%)                                           | 197 (49.6)                           | 165 (54.3)                            | N.S      |
| <b>Medication (%)</b>                               |                                      |                                       |          |
| Benzodiazepines                                     | 162 (40.8)                           | 134 (44.4)                            | N.S      |
| Antidepressants                                     | 75 (18.9)                            | 74 (24.5)                             | N.S      |
| Antidementia drugs                                  | 20 (5)                               | 11 (3.6)                              | N.S      |
| antipsychotics                                      | 24 (6)                               | 21 (7)                                | N.S      |
| Anti-Parkinson's agents                             | 13 (3.3)                             | 6(2)                                  | N.S      |
| Anticonvulsants                                     | 20 (5)                               | 16 (5.3)                              | N.S      |
| <b>Dependence in activities of daily living (%)</b> |                                      |                                       |          |
| Personal hygiene and grooming                       | 155 (39)                             | 171 (56.6)                            | <0.05    |
| Dressing and undressing                             | 155 (39)                             | 174 (57.6)                            | <0.05    |
| Getting onto or off toilet                          | 146 (36.8)                           | 161 (53.3)                            | <0.05    |
| Ambulation                                          | 163 (41.1)                           | 166 (55)                              | <0.05    |
| Bowel and bladder control                           | 139 (35)                             | 122 (40.4)                            | N.S      |
| Self-feeding                                        | 109 (27.5)                           | 102 (33.8)                            | N.S      |

**Table 2** Derivation cohort: univariate analysis of patient clinical variables considered potential risk factors for delirium at admission. Mean (SD)

| Variables                              | Delirium     | No delirium  | p     |
|----------------------------------------|--------------|--------------|-------|
| Age (years)                            | 83.83 (9.8)  | 74.75 (13.4) | 0.000 |
| Blood pressure (mmHg)                  | 127.5 (27.1) | 132.3 (26.5) | 0.22  |
| Respiratory rate (breaths/min)         | 27.92 (9.6)  | 24.42 (6.6)  | 0.001 |
| Heart rate (beats/min)                 | 86.6 (23.8)  | 84.06 (22.5) | N.S   |
| Body temperature (°C)                  | 36.7 (0.7)   | 36.7 (0.8)   | N.S   |
| Women (%)                              | 26 (50)      | 171 (49.6)   | NS    |
| Excess alcohol intake (%)              | 2 (3.8)      | 19 (5.5)     | NS    |
| Mean length of stay in hospital (days) | 9.3 (6.6)    | 8.3 (5.6)    | N.S   |
| Admission in previous year (%)         | 26 (50)      | 152 (44.1)   | NS    |
| Admission in previous month (%)        | 8(15.1)      | 45 (84.9)    | NS    |

**Table 3** Derivation cohort: univariate analysis of patient blood test results at admission. Mean (SD)

| Variables                            | Delirium     | No delirium  | p     |
|--------------------------------------|--------------|--------------|-------|
| Haematocrit (%)                      | 39.31 (7.6)  | 37.42 (6.5)  | 0.058 |
| Urea (mg/dl)                         | 62.3 (31.6)  | 60.3 (40.7)  | N.S   |
| Creatinine (mg/dl)                   | 1.14 (0.5)   | 1.25 (0.9)   | N.S   |
| Sodium (mEq/l)                       | 138.5 (5.6)  | 173.9 (5.5)  | N.S   |
| Potassium (mEq/l)                    | 5.2 (6.9)    | 4.8 (0.7)    | N.S   |
| Glucose (mg/dl)                      | 140.1 (66.3) | 140.8 (78.8) | N.S   |
| White blood cells<br>(10e3/ $\mu$ l) | 12.1 (12.2)  | 10.1(4.7)    | N.S   |
| Neutrophils<br>(10e3/ $\mu$ l)       | 9.8 (8.5)    | 10.8 (14.8)  | N.S   |

**Table 4** Derivation cohort: univariate analysis of patient medication prior to admission.

| Variables          | Delirium  | No delirium | p     |
|--------------------|-----------|-------------|-------|
| Antidepressants    | 16 (30.8) | 59 (17.1)   | 0.023 |
| Antidementia drugs | 5 (9.6)   | 15 (4.3)    | 0.16  |
| Antipsychotics     | 8 (15.4)  | 16 (4.6)    | 0.007 |
| Anticonvulsants    | 5 (9.6)   | 15 (4.3)    | 0.16  |
| Benzodiazepines    | 23 (44.2) | 139 (40.3)  | NS    |



**Table 5** Derivation cohort: variables characterising patient status on admission

| Variables              | Delirium  | No delirium | p     |
|------------------------|-----------|-------------|-------|
| Urinary catheter       | 13 (25)   | 37(10.7)    | NS    |
| Fluid therapy          | 29 (55.8) | 124 (35.9)  | 0.009 |
| Vision impairment      | 36 (69.2) | 192 (55.7)  | 0.072 |
| Hearing impairment     | 9 (17.3)  | 87 (25.2)   | NS    |
| Oxygen therapy         | 32 (61.5) | 202 (58.6)  | NS    |
| Pressure ulcers        | 3 (5.8)   | 25 (7.3)    | NS    |
| Level of consciousness | 5 (21.7)  | 18 (78.3)   | 0.20  |
| Dementia               | 18 (34.6) | 49 (14.2)   | 0.001 |
| Infection              | 28 (53.8) | 141(40.8)   | 0.097 |

**Table 6** Derivation cohort: univariate analysis of patient activities of daily living

| Variables                              | Delirium  | No delirium | p      |
|----------------------------------------|-----------|-------------|--------|
| Impaired personal hygiene and grooming | 39 (75)   | 116 (33.6)  | 0.0001 |
| Impaired dressing and undressing       | 38 (73.1) | 117 (33.9)  | 0.0001 |
| Impaired getting onto or off toilet    | 36 (69.2) | 110 (31.9)  | 0.001  |
| Impaired ambulation                    | 38 (73.1) | 125 (36.2)  | 0.001  |
| Impaired bowel and bladder control     | 36 (69.2) | 103 (29.9)  | 0.001  |
| Impaired self-feeding                  | 31 (59.6) | 78 (22.6)   | 0.000  |
| Dependence in $\geq 5$ activities      | 36 (69.2) | 87(25.2)    | 0.0001 |

**Table 7** Variables included in the logistic regression model

| Variables          | B      | SE    | Wald    | Degrees of freedom | Sig.  | Exp(B) |
|--------------------|--------|-------|---------|--------------------|-------|--------|
| Age <sup>1</sup>   | 1.381  | 0.349 | 15.664  | 1                  | 0.000 | 3.978  |
| DADLs <sup>2</sup> | 1.397  | 0.350 | 15.924  | 1                  | 0.000 | 4.042  |
| Drugs <sup>3</sup> | 1.515  | 0.443 | 11.715  | 1                  | 0.001 | 4.547  |
| Constant           | -3.234 | 0.295 | 120.122 | 1                  | 0.000 | 0.039  |

Hosmer and Lemeshow goodness of fit test p= 0.873

<sup>1</sup> Age: > 85 years old

<sup>2</sup> DADLs: Dependence in 5 or more activities of daily livings

<sup>3</sup> Drugs: total of 2 or more points for drugs taken on admission where antidepressants, antidementia drugs, and anticonvulsants score 1 point each, and antipsychotics score 2 points

**Table 8** Logistic regression model

| Group                     | Points on the prediction rule | Incidence of delirium (%) | OR                | AUC (IC 95%)     |
|---------------------------|-------------------------------|---------------------------|-------------------|------------------|
| Derivation cohort (n=397) |                               |                           |                   | 0.77 (0.73-0.82) |
|                           | 0                             | 9/219 (4)                 | Reference         |                  |
|                           | 1                             | 16/116 (14)               | 3.7 (1.5-8.7)     |                  |
|                           | ≥2                            | 27/62 (43)                | 18 (7.8-41.5)     |                  |
| Validation cohort (n=302) |                               |                           |                   | 0.85 (0.8-0.88)  |
|                           | 0                             | 5/142 (3.5)               | Reference         |                  |
|                           | 1                             | 18/77 (23)                | 8.3 (2.9-23.6)    |                  |
|                           | ≥2                            | 53/83 (64)                | 48.4 (17.8-131.4) |                  |

**Table 9** A 2 X 2 table for the validation cohort

| Cut-off point | Delirium | No delirium | Total |
|---------------|----------|-------------|-------|
| 0 (negative)  | 5        | 137         | 142   |
| ≥1 (positive) | 71       | 89          | 160   |
|               | 76       | 226         | 302   |

Sensitivity = 93.4%, 95% CI 85.5 to 97.2

Specificity = 60.6%, 95% CI 54.1 to 66.8

PPV = 44.4%, 95% CI 36.9 to 52.1

NPV = 96.5%, 95% CI 92 to 98.5

1  
2  
3  
4  
5  
6  
7  
8  
9  
10  
11  
12  
13  
14  
15  
16  
17  
18  
19  
20  
21  
22  
23  
24  
25  
26  
27  
28  
29  
30  
31  
32  
33  
34  
35  
36  
37  
38  
39  
40  
41  
42  
43  
44  
45  
46  
47  
48  
49  
50  
51  
52  
53  
54  
55  
56  
57  
58  
59  
60

Figure 1: ROC curve for the derivation cohort

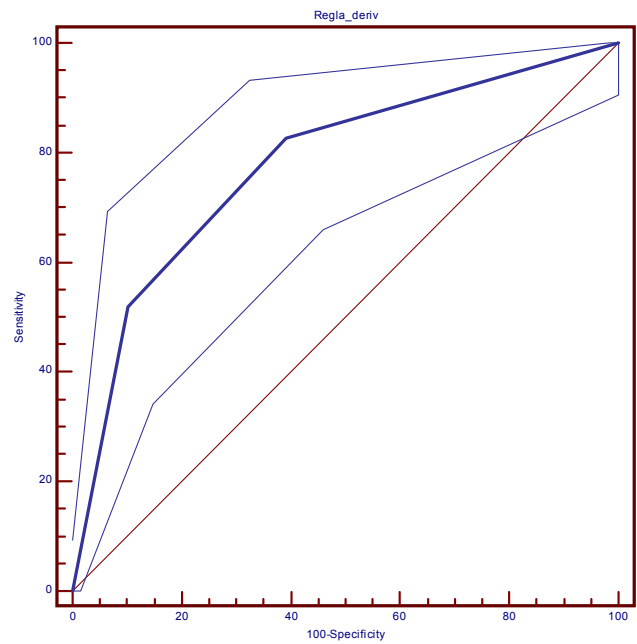

er review only

Figure 2: ROC curve for the validation cohort

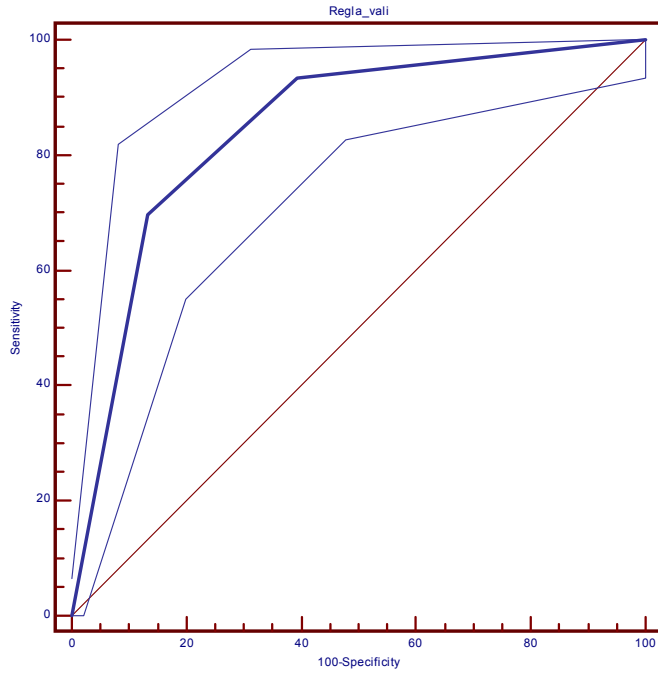

review only

STROBE Statement—Checklist of items that should be included in reports of *cohort studies*

|                              | Item No | Recommendation                                                                                                                                                                                                                                                                                                                                                                                                |
|------------------------------|---------|---------------------------------------------------------------------------------------------------------------------------------------------------------------------------------------------------------------------------------------------------------------------------------------------------------------------------------------------------------------------------------------------------------------|
| <b>Title and abstract</b>    | 1       | (a) Indicate the study's design with a commonly used term in the title or the abstract<br>(b) Provide in the abstract an informative and balanced summary of what was done and what was found                                                                                                                                                                                                                 |
| <b>Introduction</b>          |         |                                                                                                                                                                                                                                                                                                                                                                                                               |
| Background/rationale         | 2       | Explain the scientific background and rationale for the investigation being reported                                                                                                                                                                                                                                                                                                                          |
| Objectives                   | 3       | State specific objectives, including any prespecified hypotheses                                                                                                                                                                                                                                                                                                                                              |
| <b>Methods</b>               |         |                                                                                                                                                                                                                                                                                                                                                                                                               |
| Study design                 | 4       | Present key elements of study design early in the paper                                                                                                                                                                                                                                                                                                                                                       |
| Setting                      | 5       | Describe the setting, locations, and relevant dates, including periods of recruitment, exposure, follow-up, and data collection                                                                                                                                                                                                                                                                               |
| Participants                 | 6       | (a) Give the eligibility criteria, and the sources and methods of selection of participants. Describe methods of follow-up<br>(b) For matched studies, give matching criteria and number of exposed and unexposed                                                                                                                                                                                             |
| Variables                    | 7       | Clearly define all outcomes, exposures, predictors, potential confounders, and effect modifiers. Give diagnostic criteria, if applicable                                                                                                                                                                                                                                                                      |
| Data sources/<br>measurement | 8*      | For each variable of interest, give sources of data and details of methods of assessment (measurement). Describe comparability of assessment methods if there is more than one group                                                                                                                                                                                                                          |
| Bias                         | 9       | Describe any efforts to address potential sources of bias                                                                                                                                                                                                                                                                                                                                                     |
| Study size                   | 10      | Explain how the study size was arrived at                                                                                                                                                                                                                                                                                                                                                                     |
| Quantitative variables       | 11      | Explain how quantitative variables were handled in the analyses. If applicable, describe which groupings were chosen and why                                                                                                                                                                                                                                                                                  |
| Statistical methods          | 12      | (a) Describe all statistical methods, including those used to control for confounding<br>(b) Describe any methods used to examine subgroups and interactions<br>(c) Explain how missing data were addressed<br>(d) If applicable, explain how loss to follow-up was addressed<br>(e) Describe any sensitivity analyses                                                                                        |
| <b>Results</b>               |         |                                                                                                                                                                                                                                                                                                                                                                                                               |
| Participants                 | 13*     | (a) Report numbers of individuals at each stage of study—eg numbers potentially eligible, examined for eligibility, confirmed eligible, included in the study, completing follow-up, and analysed<br>(b) Give reasons for non-participation at each stage<br>(c) Consider use of a flow diagram                                                                                                               |
| Descriptive data             | 14*     | (a) Give characteristics of study participants (eg demographic, clinical, social) and information on exposures and potential confounders<br>(b) Indicate number of participants with missing data for each variable of interest<br>(c) Summarise follow-up time (eg, average and total amount)                                                                                                                |
| Outcome data                 | 15*     | Report numbers of outcome events or summary measures over time                                                                                                                                                                                                                                                                                                                                                |
| Main results                 | 16      | (a) Give unadjusted estimates and, if applicable, confounder-adjusted estimates and their precision (eg, 95% confidence interval). Make clear which confounders were adjusted for and why they were included<br>(b) Report category boundaries when continuous variables were categorized<br>(c) If relevant, consider translating estimates of relative risk into absolute risk for a meaningful time period |



|                          |    |                                                                                                                                                                            |
|--------------------------|----|----------------------------------------------------------------------------------------------------------------------------------------------------------------------------|
| Other analyses           | 17 | Report other analyses done—eg analyses of subgroups and interactions, and sensitivity analyses                                                                             |
| <b>Discussion</b>        |    |                                                                                                                                                                            |
| Key results              | 18 | Summarise key results with reference to study objectives                                                                                                                   |
| Limitations              | 19 | Discuss limitations of the study, taking into account sources of potential bias or imprecision. Discuss both direction and magnitude of any potential bias                 |
| Interpretation           | 20 | Give a cautious overall interpretation of results considering objectives, limitations, multiplicity of analyses, results from similar studies, and other relevant evidence |
| Generalisability         | 21 | Discuss the generalisability (external validity) of the study results                                                                                                      |
| <b>Other information</b> |    |                                                                                                                                                                            |
| Funding                  | 22 | Give the source of funding and the role of the funders for the present study and, if applicable, for the original study on which the present article is based              |

\*Give information separately for exposed and unexposed groups.

**Note:** An Explanation and Elaboration article discusses each checklist item and gives methodological background and published examples of transparent reporting. The STROBE checklist is best used in conjunction with this article (freely available on the Web sites of PLoS Medicine at <http://www.plosmedicine.org/>, Annals of Internal Medicine at <http://www.annals.org/>, and Epidemiology at <http://www.epidem.com/>). Information on the STROBE Initiative is available at <http://www.strobe-statement.org>.
